1 **Exportin Crm1 is repurposed as a docking protein to generate**  
2 **microtubule organizing centers at the nuclear pore**

3

4

5 Xun X. Bao<sup>1</sup>, Christos Spanos<sup>1</sup>, Tomoko Kojidani<sup>2,3</sup>, Eric M. Lynch<sup>1\*</sup>, Juri  
6 Rappsilber<sup>1,4</sup>, Yasushi Hiraoka<sup>2,5</sup>, Tokuko Haraguchi<sup>2,5</sup>, and Kenneth E. Sawin<sup>1\*\*</sup>

7

8 1. Wellcome Centre for Cell Biology, School of Biological Sciences, University of Edinburgh,  
9 Michael Swann Building, Max Born Crescent, Edinburgh EH9 3BF, UK

10

11 2. Advanced ICT Research Institute Kobe, National Institute of Information and  
12 Communications Technology, Kobe, Japan

13

14 3 Department of Chemical and Biological Sciences, Faculty of Science, Japan Women's  
15 University, Tokyo, Japan

16

17 4. Chair of Bioanalytics, Institute of Biotechnology, Technische Universität Berlin, Berlin,  
18 13355, Germany

19

20 5. Graduate School of Frontier Biosciences, Osaka University, Suita, Japan

21

22 \* *Present address*: Dept. of Biochemistry, University of Washington, 1959 NE Pacific Street,  
23 Box 357350, Seattle, WA 98195, USA

24

25 \*\* Author for correspondence

26

27 **ABSTRACT**

28

29

30 Non-centrosomal microtubule organizing centers (MTOCs) are important for  
31 microtubule organization in many cell types. In fission yeast *Schizosaccharomyces pombe*,  
32 the protein Mto1, together with partner protein Mto2 (Mto1/2 complex), recruits the  $\gamma$ -tubulin  
33 complex to multiple non-centrosomal MTOCs, including the nuclear envelope (NE). Here, we  
34 develop a comparative-interactome mass spectrometry approach to determine how Mto1  
35 localizes to the NE. Surprisingly, we find that Mto1, a constitutively cytoplasmic protein,  
36 docks at nuclear pore complexes (NPCs), via interaction with exportin Crm1 and cytoplasmic  
37 FG-nucleoporin Nup146. Although Mto1 is not a nuclear export cargo, it binds Crm1 via a  
38 nuclear export signal-like sequence, and docking requires both Ran in the GTP-bound state  
39 and Nup146 FG repeats. In addition to determining the mechanism of MTOC formation at  
40 the NE, our results reveal a novel role for Crm1 and the nuclear export machinery in the  
stable docking of a cytoplasmic protein complex at NPCs.

## 41 INTRODUCTION

42 Non-centrosomal microtubule organizing centers (MTOCs) are critical to the  
43 morphology and function of many types of cells (Petry & Vale, 2015, Sanchez & Feldman,  
44 2017, Wu & Akhmanova, 2017), especially cells in which interphase microtubules (MTs) are  
45 arranged in linear rather than radial arrays (Bartolini & Gundersen, 2006). Examples include  
46 differentiated animal cells such as neurons (Kapitein & Hoogenraad, 2015), muscle  
47 (Mogessie et al., 2015, Tassin et al., 1985), and epithelial cells (Wu & Akhmanova, 2017),  
48 and many higher plant cells (Masoud et al., 2013, Oda, 2015), as well as some single-celled  
49 eukaryotes, such as fission yeast *Schizosaccharomyces pombe* (Chang & Martin, 2009,  
50 Sawin & Tran, 2006).

51 The mechanisms underlying non-centrosomal MTOC formation are just beginning to  
52 be understood. Some non-centrosomal MTs are thought to be generated by nucleation-and-  
53 release from the centrosome, followed by minus-end stabilization and anchoring elsewhere  
54 in the cell (Bartolini & Gundersen, 2006, Sanchez & Feldman, 2017, Wu & Akhmanova,  
55 2017). However, in many cases MTs are nucleated directly from non-centrosomal sites by  
56 the  $\gamma$ -tubulin complex, the primary microtubule-nucleation complex in eukaryotic cells  
57 (Kollman et al., 2011, Petry & Vale, 2015). Understanding how the  $\gamma$ -tubulin complex is  
58 recruited to these sites is thus key to deciphering the fundamental mechanisms of non-  
59 centrosomal MT organization (Lin et al., 2015).

60 Sites of non-centrosomal  $\gamma$ -tubulin complex recruitment include pre-existing  
61 microtubules themselves, as well as membrane-bound compartments such as the Golgi  
62 apparatus and the nuclear envelope (NE). Recruitment of the  $\gamma$ -tubulin complex to pre-  
63 existing microtubules depends on the multi-subunit augmin complex, in both animals and  
64 plants (Goshima et al., 2008, Liu et al., 2014, Sanchez-Huertas et al., 2016). Microtubule  
65 nucleation and organization by the Golgi apparatus is orchestrated largely by AKAP450,  
66 which recruits not only the  $\gamma$ -tubulin complex but also its activators, as well as MT minus-end  
67 stabilizers (Rivero et al., 2009, Wu et al., 2016). Combined recruitment of  $\gamma$ -tubulin complex  
68 and MT minus-end stabilizers/anchoring proteins is also important for MTOC organization at  
69 the cell cortex in diverse types of epithelial cells (summarized in (Sanchez & Feldman, 2017,  
70 Wu & Akhmanova, 2017)).

71 MTOC formation at the NE remains poorly understood. The NE is an important MT  
72 nucleation site both in muscle cells (Tassin et al., 1985) and in higher plants (Ambrose &  
73 Wasteneys, 2014, Masoud et al., 2013, Stoppin et al., 1994), as well as in fission yeast  
74 (Lynch et al., 2014, Sawin & Tran, 2006). In muscle,  $\gamma$ -tubulin complex components and  
75 associated proteins are redistributed from the centrosome to the NE during  
76 development/differentiation, coincident with a decrease in centrosomal MT nucleation and

77 large-scale changes in intracellular MT organization (Bugnard et al., 2005, Fant et al., 2009,  
78 Srsen et al., 2009, Zebrowski et al., 2015). In plant cells, which lack centrosomes  
79 altogether, many of the same proteins are similarly observed on the NE, especially before  
80 and/or after cell division (Erhardt et al., 2002, Janski et al., 2012, Nakamura et al., 2012,  
81 Seltzer et al., 2007). However, the mechanisms that regulate their recruitment are largely a  
82 mystery.

83 Fission yeast nucleate MTs from multiple non-centrosomal sites through the cell  
84 cycle and thus provide an excellent system to study non-centrosomal MTOCs, including  
85 those on the NE (Sawin & Tran, 2006). During interphase, linear arrays of MTs are  
86 nucleated from the spindle pole body (SPB; the yeast centrosome equivalent), from MTOCs  
87 on the NE and on pre-existing microtubules, and from “free” MTOCs in the cytoplasm. As  
88 cells enter mitosis, non-centrosomal MT nucleation is switched off (Borek et al., 2015) and  
89 the duplicated SPBs become the only active MTOCs, nucleating both intranuclear spindle  
90 MTs and cytoplasmic astral MTs. Towards the end of cell division, microtubules are  
91 nucleated from the cytokinetic actomyosin ring (CAR). By contrast, in budding yeast  
92 *Saccharomyces cerevisiae*, the SPBs are the only MTOCs throughout the cell cycle.

93 In fission yeast, all MT nucleation in the cytoplasm (i.e. both centrosomal and non-  
94 centrosomal nucleation) depends on the Mto1/2 complex (Janson et al., 2005, Samejima et  
95 al., 2005, Sawin et al., 2004, Venkatram et al., 2005, Venkatram et al., 2004). Mto1/2  
96 contains multiple copies of the proteins Mto1 and Mto2 and directly recruits the  $\gamma$ -tubulin  
97 complex to prospective MTOC sites. Mto1/2 interacts with the  $\gamma$ -tubulin complex via Mto1’s  
98 Centrosomin Motif 1 (CM1) domain, which is conserved in higher eukaryotic MTOC  
99 regulators such as *Drosophila* centrosomin, and human CDK5RAP2 and myomegalin  
100 (Samejima et al., 2008, Sawin et al., 2004, Zhang & Megraw, 2007). Interaction of CM1-  
101 domain proteins with the  $\gamma$ -tubulin complex can also serve to activate the  $\gamma$ -tubulin complex  
102 (Choi et al., 2010, Lynch et al., 2014), although the detailed mechanisms remain unclear.

103 Because Mto1/2 localizes to prospective MTOC sites independently of interacting  
104 with the  $\gamma$ -tubulin complex (Samejima et al., 2008), Mto1/2 localization effectively determines  
105 where and when all cytoplasmic MTOCs are generated, and thus understanding Mto1/2  
106 localization is critical to understanding MTOC formation more broadly. Mto1/2 localization is  
107 mediated primarily by domains within Mto1 (Fig. 1A; (Samejima et al., 2010)), although Mto2  
108 contributes indirectly by helping to multimerize the Mto1/2 complex (Lynch et al., 2014,  
109 Samejima et al., 2005). Mto1/2 association with pre-existing MTs depends on a broadly  
110 defined region near the Mto1 C-terminus, while localization to the CAR and the SPB is  
111 mediated by overlapping modular sequences within the conserved MASC domain at the  
112 Mto1 C-terminus (Samejima et al., 2010). Localization to the CAR involves interaction of



113 MASC with the unconventional myosin Myp2, while localization to the SPB involves the  
114 Septation Initiation Network protein Cdc11 (Samejima et al., 2010).

115 Here we determine the mechanism of Mto1/2 localization to the NE. Using a  
116 comparative-interactome mass spectrometry approach, we find that NE localization depends  
117 on the Mto1 N-terminus interacting with exportin Crm1, a nuclear transport receptor, and  
118 nucleoporin Nup146, a component of the nuclear pore complex (NPC). We further find that  
119 although Mto1 is an exclusively cytoplasmic protein, it becomes stably docked at the NPC-by  
120 mimicking a nuclear export cargo. In addition to revealing the mechanism of MTOC  
121 formation at the fission yeast NE, our work demonstrates a completely novel role for the  
122 nuclear export machinery, in which the exportin is repurposed to create NPC-docking sites  
123 for cytoplasmic proteins with functions unrelated to nuclear export.

124

## 125 RESULTS

### 126 ***MT nucleation from the NE contributes to nuclear positioning***

127 Mto1 localization to the NE is enhanced in the C-terminal truncation mutant  
128 Mto1[NE], which lacks MASC and MT-localization domains ((Lynch et al., 2014); Fig. 1A).  
129 Previously we deleted amino acids 1-130 from Mto1[NE] and from full-length Mto1 to make  
130 Mto1[bonsai] and Mto1[Δ130], respectively (Fig. 1A), and we showed that these deletions  
131 lead to loss of Mto1/2 complex from the NE, accompanied by loss of MT nucleation from the  
132 NE (Lynch et al., 2014). However, in that work the consequences of this altered MT  
133 nucleation were not investigated. In fission yeast, MT-dependent pushing forces are thought  
134 to center the interphase nucleus precisely in the cell middle (Tran et al., 2001). Because  
135 nuclear position during early mitosis determines the future cell division plane, this ensures  
136 equal size of daughter cells after cell division (Daga & Chang, 2005). To investigate whether  
137 MT nucleation from the NE contributes to nuclear positioning, we measured interphase  
138 nuclear position in *mto1-GFP*, *mto1[NE]-GFP*, *mto1[Δ130]-GFP* and *mto1[bonsai]-GFP* cells  
139 (Fig. 1A; Fig. 1 Suppl. 1A). (In these and all subsequent experiments, *mto1* mutants replace  
140 endogenous wild-type *mto1+* at the *mto1* locus, and in this particular experiment, all versions  
141 of *mto1* were GFP-tagged to equalize protein expression levels (Lynch et al., 2014)).  
142 Interestingly, nuclear positioning was less accurate in *mto1[bonsai]-GFP* and *mto1[Δ130]-*  
143 *GFP* cells compared to *mto1[NE]-GFP* and *mto1-GFP* cells, indicating that MT nucleation  
144 from the NE contributes to nuclear positioning. By contrast, there was no difference in  
145 nuclear positioning between wild-type and *mto1[NE]* cells, or between *mto1[131-1115]* and  
146 *mto1[bonsai]* cells, indicating that MT nucleation from the SPB is not particularly important  
147 for nuclear positioning.

148

149

150 **Identification of proteins interacting with Mto1[NE] but not with Mto1[bonsai]**

151 To identify proteins involved in recruiting Mto1 to the NE, we wanted to compare  
152 interactomes of Mto1[NE] vs. Mto1[bonsai]. Initially we attempted to use SILAC mass  
153 spectrometry (MS) (Bicho et al., 2010, Ong et al., 2002) to compare anti-GFP  
154 immunoprecipitates of Mto1[9A1-NE]-GFP and Mto1[9A1-bonsai]-GFP, which are otherwise  
155 identical to Mto1[NE]-GFP and Mto1[bonsai]-GFP except for the additional mutation of nine  
156 consecutive amino acids in the CM1 domain to alanine (Samejima et al., 2008), Fig 1A); the  
157 9A1 mutation disrupts interaction with the  $\gamma$ -tubulin complex and thereby enhances  
158 localization of Mto1[NE] to the NE ((Lynch et al., 2014); Fig. 1 Suppl. 1B). In preliminary  
159 experiments, however, we found that the immunoprecipitation approach yielded low peptide  
160 counts for many Mto1-interactors of potential interest (Suppl. File 2). We therefore decided  
161 to develop a more robust method to capture interactors even when they may be low-  
162 abundance and/or low-affinity interactors.

163 We tagged Mto1[9A1-NE] and Mto1[9A1-bonsai] at their N-termini with GFP and at  
164 their C-termini with an HTB (His-TEV-biotin) tag, which allows for two-step purification of a  
165 tagged protein under fully denaturing conditions after cross-linking to interactors (Tagwerker  
166 et al., 2006) (Fig. 1B). As expected, GFP-Mto1[9A1-NE]-HTB localized to the NE in vivo,  
167 while GFP-Mto1[9A1-bonsai]-HTB was present only in the cytoplasm (Fig. 1C).  
168 Disuccinimidyl suberate (DSS) cross-linking of cell cryogrindates shifted a significant  
169 proportion of HTB-tagged Mto1 into higher molecular-weight species (Fig. 1D). After DSS  
170 cross-linking and denaturing purification (Fig. 1E; see Materials and Methods), we analyzed  
171 cross-linked adducts of GFP-Mto1[9A1-NE]-HTB and GFP-Mto1[9A1-bonsai]-HTB by label-  
172 free quantification (LFQ) MS ((Cox & Mann, 2008, Tyanova et al., 2016); Fig. 1F; Fig. 1  
173 Suppl. 1C; Suppl. File 3). Among the proteins significantly enriched in the Mto1[9A1-NE]  
174 interactome vs. the Mto1[9A1-bonsai] interactome, we identified nucleoporin Nup146  
175 (Asakawa et al., 2014, Chen et al., 2004), exportin Crm1 (Adachi & Yanagida, 1989, Fung &  
176 Chook, 2014, Hutten & Kehlenbach, 2007, Stade et al., 1997), the fission yeast TACC  
177 homolog, Alp7 (Sato et al., 2004), and, to a lesser extent, polo kinase Plo1 (Ohkura et al.,  
178 1995).

179 Neither Alp7 nor Plo1 is known to localize to the NE, and Plo1 was not investigated  
180 further. The interaction of Mto1[NE] with Alp7 was of potential interest because of the role of  
181 Alp7 in microtubule organization (Ling et al., 2009, Sato et al., 2009, Zheng et al., 2006), and  
182 an interaction between Mto1 and Alp7 has been confirmed independently (M. Sato, Waseda  
183 University, personal communication, July 2017). However, we found that in *alp7* $\Delta$  deletion  
184 mutants, Mto1[9A1-NE]-GFP was present on the NE just as in wild-type (*alp7*<sup>+</sup>) cells (Fig. 1  
185 Suppl. 1D). This indicates that Alp7 is not required for Mto1 localization to the NE.

186

187 ***Mto1[NE] associates with the cytoplasmic face of the NPC***

188 The interaction of Mto1[9A1-NE] with Nup146 suggested that Mto1 may localize to  
189 nuclear pore complexes (NPCs) on the NE. We therefore imaged Mto1[9A1-NE]-GFP  
190 together with Nup146-3mCherry in a *nup132Δ* background, in which NPCs can become  
191 clustered on the NE (Bai et al., 2004). We observed extensive colocalization of Mto1[9A1-  
192 NE]-GFP with Nup146-3mCherry clusters (Fig. 2A), indicating specific association with  
193 NPCs.

194 We also examined Mto1[9A1-NE]-GFP localization by immunoelectron microscopy.  
195 Close homologs of Nup146 in budding yeast (Nup159; referred to here as Sc Nup159) and  
196 humans (Nup214; referred to as *Hs* Nup214) are both located exclusively at the cytoplasmic  
197 face of NPCs (Gorsch et al., 1995, Kraemer et al., 1994, Kraemer et al., 1995), and indirect  
198 evidence suggests that this is also the case for Nup146 (Lo Presti et al., 2012). Consistent  
199 with this, we observed Mto1[9A1-NE]-GFP specifically at the cytoplasmic face of NPCs (Fig.  
200 2B).

201  
202 ***Mto1 localization to NPCs requires export cargo-binding activity of exportin Crm1***

203 The interaction of Mto1[NE] with Crm1 was both surprising and puzzling. As the  
204 major transport receptor for nuclear export of proteins (as well as some RNAs), Crm1  
205 normally forms a trimeric complex with export cargo and RanGTP within the nucleus, which  
206 facilitates transit of cargo through the permeability barrier of the NPC and into the cytoplasm  
207 (Dong et al., 2009, Fung & Chook, 2014, Hutten & Kehlenbach, 2007). However, to date  
208 there is no evidence that Mto1 is a nuclear export cargo or indeed is ever present in the  
209 nucleus.

210 Because deletion of *crm1+* is lethal (Adachi & Yanagida, 1989), we investigated the  
211 significance of the Mto1-Crm1 interaction by asking whether inhibition of Crm1 cargo-binding  
212 activity affects Mto1 localization to NPCs. Nuclear export cargos typically bind to Crm1 via  
213 hydrophobic nuclear export signals (NESs) (Dong et al., 2009, Fung & Chook, 2014, Fung et  
214 al., 2015, Guttler et al., 2010, Hutten & Kehlenbach, 2007, Kutay & Guttinger, 2005). This  
215 can be inhibited by the drug leptomycin B (LMB), which binds within the hydrophobic NES-  
216 binding cleft of Crm1 ((Dong et al., 2009, Fornerod et al., 1997a, Fukuda et al., 1997, Fung  
217 & Chook, 2014, Ossareh-Nazari et al., 1997). As a result, when cells are treated with LMB,  
218 nuclear export cargos accumulate within the nucleus. Interestingly, after LMB treatment, we  
219 found that Mto1[9A1-NE]-GFP was lost from NPCs (Fig. 3A). Strikingly, however, rather than  
220 accumulating in the nucleus, Mto1[9A1-NE]-GFP became dispersed in the cytoplasm.

221 Given the unusual behavior of Mto1[9A1-NE]-GFP after LMB treatment, we  
222 confirmed that LMB was inhibiting nuclear export. We assayed localization of Alp7, which  
223 shuttles continuously in and out of the nucleus during interphase, in complex with its partner

224 protein Alp14 (ch-TOG homolog) (Okada & Sato, 2015, Okada et al., 2014)(Fig. 3 Suppl.  
225 1A). In the absence of LMB, Alp7-3GFP was present in the cytoplasm, primarily as puncta  
226 on cytoplasmic MTs. As expected, after LMB treatment, Alp7-3GFP accumulated in the  
227 nucleoplasm and on the intranuclear MT bundle that forms upon LMB treatment of fission  
228 yeast (Matsuyama et al., 2006)(Fig. 3 Suppl. 1A).

229 In addition, to rule out the possibility that loss of Mto1[9A1-NE]-GFP from NPCs was  
230 due to an off-target effect of LMB (i.e., unrelated to Crm1 inhibition), we generated an LMB-  
231 resistant *crm1* mutant. LMB is a particularly potent inhibitor of Crm1 because it reacts  
232 covalently with cysteine 529 (C529) in Crm1's NES-binding cleft (Kudo et al., 1999). We  
233 mutated C529 in the endogenous *crm1* coding sequence to alanine (*crm1-C529A*), as well  
234 as to other amino acids (Fig. 3B, Fig. 3 Suppl. 1B,C). The *crm1-C529A* mutant was viable,  
235 indicating that it preserves essential functions of *crm1* for nuclear export, and resistant to  
236 high concentrations of LMB (Fig. 3 Suppl. 1B). Interestingly, we found that in *crm1-C529A*  
237 cells, Mto1[9A1-NE]-GFP localized to NPCs both in the absence and in the presence of LMB  
238 (Fig. 3B). This demonstrates that loss of Mto1 from NPCs after LMB treatment can be  
239 specifically attributed to inhibition at the Crm1 cargo-binding cleft.

240

#### 241 ***Mto1 interacts with Crm1 via a nuclear export signal-like sequence***

242 How might Crm1 cargo-binding activity be involved in Mto1 localization to the NPC?  
243 We hypothesized that Mto1 itself might bind to Crm1 as an unconventional "cargo" and  
244 somehow exploit this interaction to localize to the cytoplasmic face of the NPC. To test this,  
245 we used LFQ MS to compare GFP-Mto1[9A-NE]-HTB interactomes prepared from untreated  
246 vs. LMB-treated cells (Fig 3C; Fig. 3 Suppl. 1D; Suppl. File 4). Interestingly, only 3-4 out of  
247 nearly 500 quantified proteins were significantly enriched in the GFP-Mto1[9A1-NE]-HTB  
248 interactome from untreated cells compared to LMB-treated cells. Among these, Crm1  
249 showed the greatest enrichment (~20X). Nup146 also showed enrichment, but to a lesser  
250 extent (~2.8X), which may indicate that Mto1 can bind weakly to Nup146 independently of  
251 Crm1 (see Discussion). These results demonstrate that, like Mto1 localization to NPCs,  
252 Mto1 interaction with Crm1 requires Crm1 cargo-binding activity.

253 Based on these findings, we next used the LocNES algorithm (Xu et al., 2015) to  
254 search for NES-like sequences within the N-terminal 130 amino acids of Mto1, which are  
255 present in Mto1[NE] but absent from Mto1[bonsai]. The sequence spanning Mto1 amino  
256 acids 9-25 contained two closely overlapping candidate NESs (Fig. 4A). Interestingly, the  
257 spacing of hydrophobic amino acids within this NES-like sequence is similar to that of  
258 several non-natural high-affinity NESs (Fig. 4B; (Engelsma et al., 2004, Guttler et al., 2010)).

259 To investigate the role of the Mto1 NES-like sequence, we deleted the first 25 amino  
260 acids of Mto1 from GFP-Mto1[9A1-NE]-HTB. The truncated protein, termed GFP-

261 Mto1[ $\Delta$ NES-9A1-NE]-HTB, failed to localize to NPCs and instead was present in the  
262 cytoplasm (Fig. 4C). In parallel, we used LFQ MS to determine how the  $\Delta$ NES truncation  
263 affected the GFP-Mto1[9A1-NE]-HTB interactome. As with LMB treatment, very few proteins  
264 were enriched in the GFP-Mto1[9A1-NE]-HTB interactome compared to GFP-Mto1[ $\Delta$ NES-  
265 9A1-NE]-HTB interactome (Fig. 4D; Fig. 4 Suppl. 1; Suppl. File 5). However, we observed  
266 strong enrichment of both Crm1 (~85X) and Nup146 (~20X). The importance of the Mto1  
267 NES-like sequence both for localization to NPCs and for interaction with Crm1 strongly  
268 suggests that Mto1 is a direct but unconventional cargo for Crm1. Because of the unusual  
269 role of the Mto1 NES-like sequence, we will refer to it as a “NES-mimic” (NES-M).

270

### 271 ***The Mto1 NES-mimic is sufficient for nuclear envelope localization***

272 We next asked whether the Mto1 NES-M is sufficient to localize a reporter protein to  
273 the NPC. We replaced endogenous Mto1 with GFP-Mto1[1-29]-GST, which contains only  
274 the first 29 amino acids of Mto1. Strikingly, GFP-Mto1[1-29]-GST localized to puncta on the  
275 NE, which we interpret to be NPCs (Fig.4E). By contrast, GFP-Mto1[1-12]-GST, which lacks  
276 the NES-M, did not show any specific localization. We further found that after LMB  
277 treatment, GFP-Mto1[1-29]-GST was lost from NPCs (Fig. 4F); moreover, like Mto1[9A1-  
278 NE]-GFP, GFP-Mto1[1-29]-GST was present exclusively in the cytoplasm after LMB  
279 treatment.

280 Compared to GFP fusions with Mto1[NE], GFP-Mto1[1-29]-GST had a weaker  
281 punctate localization at NPCs. We hypothesized that this may be due an avidity effect,  
282 because Mto1[NE] can form higher-order multimers, via its coiled-coil region and via  
283 interaction with Mto2 (Lynch et al., 2014), whereas GFP-Mto1[1-29]-GST would be expected  
284 to form only dimers, via the GST domain. To investigate whether dimerization may  
285 contribute to NPC localization, we analyzed localization of a GFP-Mto1[1-29]-13Myc fusion  
286 protein, which should be monomeric. GFP-Mto1[1-29]-13Myc did not localize to NPCs (Fig.  
287 4E), suggesting that dimerization/multimerization may be an important factor for Mto1 NPC  
288 localization.

289 Collectively, these results indicate the Mto1 NES-M is both necessary and sufficient  
290 for localization to NPCs, without ever being present in the nucleus.

291

### 292 ***Mto1 NPC localization requires RanGTP***

293 To further investigate similarities between the mechanism of Mto1 localization to  
294 NPCs and nuclear export, we tested whether Mto1 localization depends on the nucleotide  
295 state of Ran. Net directional transport of conventional cargos through the NPC depends on a  
296 RanGTP gradient across the NE, generated by Ran GTPase activating protein (RanGAP) in  
297 the cytoplasm and Ran guanine-nucleotide exchange factor (RanGEF) in the nucleus



298 (Aitchison & Rout, 2012, Gorlich & Kutay, 1999, Wentz & Rout, 2010). Importins bind import  
299 cargos in the cytoplasm, where RanGTP concentration is low, and release them in the  
300 nucleus, where RanGTP concentration is high. By contrast, exportins bind cooperatively to  
301 export cargos and RanGTP within the nucleus to form trimeric export complexes, which then  
302 dissociate after export, accompanied by RanGTP hydrolysis aided by RanGAP (Fornerod et  
303 al., 1997a, Fung & Chook, 2014, Guttler & Gorlich, 2011, Koyama & Matsuura, 2012,  
304 Monecke et al., 2014). The role of Ran can be addressed by expressing mutant versions of  
305 Ran (encoded by the *spi1+* gene in fission yeast; (Matsumoto & Beach, 1991)) that mimic  
306 either GTP or GDP states (Bischoff et al., 1994, Klebe et al., 1995). Constitutively-active  
307 Ran (RanQ69L in humans) is defective in GTP hydrolysis and thus “locked” in the RanGTP  
308 state, while inactive/dominant-negative Ran (RanT24N in humans) has low affinity for  
309 nucleotide and competes with endogenous RanGDP for binding to RanGEF.

310 We expressed wild-type *spi1+*, *spi1[Q68L]* (equivalent to human RanQ69L), and  
311 *spi1[T23N]* (equivalent to human RanT24N) as integrated transgenes from a thiamine-  
312 repressible promoter. All cells were viable under repressing conditions, but growth was  
313 impaired by expression of *spi1[Q68L]* or *spi1[T23N]* (Fig. 5 Suppl. 1A), consistent with  
314 phenotypes of the equivalent mutants in vertebrate cells (Clarke et al., 1995, Dasso et al.,  
315 1994, Kornbluth et al., 1994, Ren et al., 1994). To avoid any indirect effects on Mto1[9A1-  
316 NE]-GFP localization as a result of growth impairment, we assayed localization as early as  
317 possible during expression (Fig. 5, Fig. 5 Suppl. 1B). Expression of *spi1+* had no effect on  
318 Mto1[9A1-NE]-GFP localization. Expression of *spi1[Q68L]* impaired import of a nuclear  
319 localization signal (NLS) reporter protein, as expected (Fig. 5 Suppl. 1B), but did not alter  
320 Mto1[9A1-NE]-GFP localization to NPCs. Interestingly, expression of *spi1[T23N]*, which had  
321 only minor effects on NLS reporter localization, led to strong loss of Mto1[9A1-NE]-GFP from  
322 NPCs (Fig. 5, Fig. 5 Suppl. 1B). These results indicate that, like nuclear export, Mto1  
323 localization to NPCs requires RanGTP. Moreover, at least in the short-term, neither  
324 RanGDP nor Ran nucleotide cycling is required for Mto1 NPC localization.

325

### 326 ***Mto1-Crm1 complex docks at the NPC via Nup146 FG repeats.***

327 We next asked whether Nup146 contributes to Mto1 NPC localization. Like  
328 approximately one-third of all nucleoporins, Nup146 and its homologs *Sc* Nup159 and *Hs*  
329 Nup214 contain multiple phenylalanine-glycine (FG) repeats, which bind directly to importins  
330 and/or exportins (Fig. 6 Suppl. 1A; (Aitchison & Rout, 2012, Wentz & Rout, 2010)). Because  
331 of their location on the cytoplasmic face of the NPC, these nucleoporins are classified as  
332 “cytoplasmic FG-Nups”, distinguishing them from the “symmetric FG-Nups” present within  
333 the central permeability barrier of the NPC. While FG repeats of symmetric FG-Nups directly  
334 facilitate cargo transport through the NPC, FG repeats of cytoplasmic FG-Nups are thought

335 not to be important for transport *per se* (Adams et al., 2014, Strawn et al., 2004, Zeitler &  
336 Weis, 2004), although their other (non-FG) regions recruit proteins for processes linked to  
337 transport (e.g. mRNP processing after export (Napetschnig et al., 2007, Schmitt et al., 1999,  
338 Weirich et al., 2004); Fig. 6 Suppl. 1A). Nevertheless, the FG repeats of *Sc* Nup159 and *Hs*  
339 Nup214 have been shown to bind to Crm1 with high specificity relative to other  
340 importins/exportins. (Allen et al., 2002, Fornerod et al., 1997b, Hutten & Kehlenbach, 2006,  
341 Port et al., 2015, Roloff et al., 2013, Zeitler & Weis, 2004). We therefore focused attention on  
342 the Nup146 FG repeats.

343 We deleted the 50-amino-acid region comprising FG repeats 5-12 (out of a total of 16  
344 FG repeats) from the endogenous *nup146* coding sequence (Fig. 6A). Although complete  
345 deletion of *nup146* is lethal (Chen et al., 2004), the *nup146*[ $\Delta$ FG5-12] strain was viable, and  
346 Nup146[ $\Delta$ FG5-12]-3mCherry was localized to NPCs. (Fig. 6 Suppl. 1B). Strikingly, in  
347 *nup146*[ $\Delta$ FG5-12] cells, Mto1[9A1-NE]-GFP no longer localized to NPCs and instead was  
348 present only in the cytoplasm (Fig. 6B; Fig. 6 Suppl. 1B).

349 We also analyzed MTOC activity at the NE in wild-type (*nup146*+) cells vs. *nup146*  
350 [ $\Delta$ FG5-12] cells. We used immunofluorescence to assay MT regrowth after cold-shock, in  
351 cells expressing full-length Mto1 (Fig. 6C). In wild-type cells, cold-induced MT  
352 depolymerization causes the pool of Mto1 normally associated with the cytoplasmic MTs to  
353 redistribute to the NE; as a result, when cells are rewarmed, nearly all MT nucleation  
354 initiates from the NE (Sawin et al., 2004). By contrast, we found that during MT regrowth in  
355 *nup146*[ $\Delta$ FG5-12] cells, MTs were nucleated randomly in the cytoplasm (Fig. 6C).

356 In addition, we used live-cell imaging of GFP-tubulin to assay steady-state MT  
357 nucleation in cells expressing Mto1[NE]-GFP (Fig. 6D, E; in these cells, Mto1[NE]-GFP is  
358 too faint to be seen relative to GFP-tubulin). In *nup146*[ $\Delta$ FG 5-12] cells, MT nucleation  
359 frequency in the vicinity of the NE was decreased by ~90% relative to wild-type (*nup146*+)   
360 cells, while nucleation frequency away from the NE was unchanged.

361 Collectively, these results indicate that Nup146 FG repeats 5-12 are essential for  
362 Mto1 docking at the NPC and, consequently, for MTOC nucleation from the NE. To our  
363 knowledge, this is the first biological function that can be uniquely attributed to the FG  
364 repeats of the Nup146/*Sc* Nup159/*Hs* Nup214 class of cytoplasmic FG-Nups, in any  
365 organism (see Discussion).

366

### 367 ***Nup146* FG repeats stabilize the Mto1-Crm1 interaction**

368 Our results thus far indicate that a RanGTP-dependent Mto1-Crm1 “cargo-like”  
369 complex docks at the cytoplasmic face of the NPC via a mechanism involving Nup146 FG  
370 repeats (see Fig. 7). Interestingly, a subset of FG repeats in *Hs* Nup214 have been shown to  
371 bind to Crm1 in a manner that stabilizes the Crm1-RanGTP-cargo interaction *in vitro*

372 (Askjaer et al., 1999, Fornerod et al., 1997b, Hutten & Kehlenbach, 2006, Kehlenbach et al.,  
373 1999, Port et al., 2015, Roloff et al., 2013). We therefore asked whether Nup146 FG repeats  
374 5-12 are important for Mto1 interaction with Nup146, and whether these repeats contribute  
375 to Crm1 association with Mto1 *in vivo*. We used LFQ MS to compare GFP-Mto1[9A1-NE]-  
376 HTB interactomes from wild-type (*nup146+*) vs. *nup146[ΔFG5-12]* cells. Among more than  
377 500 quantified proteins, only 5-6 proteins were significantly enriched in the GFP-Mto1[9A1-  
378 NE]-HTB interactome from *nup146+* cells compared to *nup146[ΔFG5-12]* cells. Nup146 itself  
379 showed the greatest enrichment (~11X), while Crm1 was also enriched, although to a lesser  
380 extent (~3X) (Fig. 6F; Fig. 6 Suppl. 1C; Suppl. File 6). This suggests that Nup146 FG  
381 repeats are essential for interaction of Mto1 with Nup146. In addition, while Nup146 FG  
382 repeats may not be absolutely essential for formation of an Mto1-Crm1 complex, they may  
383 help to stabilize it.

384

## 385 DISCUSSION

386 While different mechanisms are involved in generating non-centrosomal MTOCs at  
387 different subcellular sites, at many sites the mechanisms themselves remain poorly  
388 understood (Petry & Vale, 2015, Sanchez & Feldman, 2017, Wu & Akhmanova, 2017). Here  
389 we have shown how MTOCs are generated at the NE in fission yeast *S. pombe* via the  
390 Mto1/2 complex. We find that Mto1 docks at the cytoplasmic face of NPCs, through a novel  
391 mechanism in which the nuclear export machinery is repurposed for a non-export-related  
392 function. Docking depends on an export cargo-like interaction between a NES-like sequence  
393 (NES-M) at the Mto1 N-terminus and the NES-binding cleft of exportin Crm1, the major  
394 transport receptor for protein nuclear export (Fung & Chook, 2014, Hutten & Kehlenbach,  
395 2007, Kutay & Guttinger, 2005). Docking further requires RanGTP and the central FG  
396 repeats of Nup146, a cytoplasmic FG-Nup homologous to *Sc* Nup159 and *Hs* Nup214. The  
397 general features of Mto1 docking at NPCs are summarized in Fig. 7.

398 In this work, chemical cross-linking of cell cryogrindates allowed us to capture low-  
399 affinity interactions that might otherwise be unstable during conventional purification. By  
400 using affinity tags compatible with strong denaturing conditions (Tagwerker et al., 2006), we  
401 were able to solubilize and interrogate protein-protein interactions that normally occur within  
402 “solid-phase” subcellular environments. In addition, by combining live-cell microscopy with  
403 LFQ MS (Cox & Mann, 2008) we were able to correlate changes in Mto1 localization with  
404 changes in interactors on a near proteome-wide scale, and under several different  
405 comparative conditions.

406 The mechanism described here for Mto1 localization to NPCs was entirely  
407 unexpected. While it incorporates many of the elements of conventional Crm1-dependent  
408 nuclear export (Fig. 7), there are two fundamental distinctions. First, when not interacting



409 with the export machinery, Mto1 (and its partner Mto2) is a cytoplasmic protein rather than a  
410 nuclear protein. Second, interaction of Mto1 with the export machinery leads to docking at  
411 NPCs, rather than a return/release into the cytoplasm. Previously, nuclear transport  
412 receptors such as importins and Crm1 have been shown to function away from NPCs in  
413 non-transport-related roles, including regulation of mitotic spindle assembly factors  
414 (reviewed in (Cavazza & Vernos, 2015, Forbes et al., 2015, Kalab & Heald, 2008)), targeting  
415 of the Ran pathway to kinetochores (Arnaoutov et al., 2005), and tethering the Chromosome  
416 Passenger Complex to centromeric chromatin (Knauer et al., 2006). However, to our  
417 knowledge, this is the first example of a nuclear export-like complex being used to dock a  
418 cytoplasmic “cargo” at the NPC, with no obvious functional link to export. This in turn raises  
419 questions as to how such a complex could be formed, and how it becomes docked.

420

### 421 **Docking at the NPC**

422 How does Mto1, a nuclear export cargo “mimic”, become docked at the NPC, while  
423 conventional export cargos are released into the cytoplasm? Ultimately, a detailed  
424 understanding of this issue will require *in vitro* biochemistry with purified proteins. However,  
425 based on previous work in mammalian cells (Engelsma et al., 2004, Port et al., 2015), we  
426 speculate that docking may depend on: 1) the Mto1 NES-M acting as a high-affinity NES;  
427 and 2) the stability of interaction between Mto1-Crm1 and Nup146 FG repeats.

428 The Mto1 NES-M is necessary and sufficient for docking at the NPC (Fig. 4).  
429 Interestingly, in human cells, cargo containing a non-natural, high-affinity NES (a  
430 “supraphysiological NES”) was shown to accumulate at the cytoplasmic face of the NPC and  
431 also to enhance Crm1 accumulation at the same site (Engelsma et al., 2004, Engelsma et  
432 al., 2008). We hypothesize that the Mto1 NES-M may be a *natural* high-affinity NES. In  
433 recent years, the NES “consensus” has evolved in concert with new experimental findings  
434 (Dong et al., 2009, Fung et al., 2015, Fung et al., 2017, Guttler et al., 2010, Monecke et al.,  
435 2009). In particular, relative to an original consensus involving four spaced hydrophobic  
436 residues (Kutay & Guttinger, 2005), several high-affinity NESs depend on a fifth hydrophobic  
437 residue, which may also be present in the Mto1 NES-M (Fig. 4B). We also note that  
438 Mto1[9A1-NE]-GFP localizes to NPCs in *crm1-C529A* mutants (Fig. 3B) but fails to localize  
439 to NPCs in *crm1-C529S*, *crm1-C529T*, and *crm1-C529V* mutants, even though these  
440 mutants are viable and thus competent for nuclear export (Fig. 3 Suppl. 1B, C). This may  
441 indicate that, relative to conventional NESs, the binding of the Mto1 NES-M to Crm1 involves  
442 recognition of additional features within the Crm1 NES-binding cleft.

443 Assuming that the Mto1 NES-M interacts with Crm1 as a high-affinity NES, clues as  
444 to how this could lead to accumulation at the NPC can be found in structural studies of Crm1  
445 alone and Crm1 in complex with RanGTP, cargo, and an FG-repeat fragment of *Hs* Nup214

446 (Fig. 7 Suppl. 1A; (Dong et al., 2009, Guttler et al., 2010, Monecke et al., 2009, Monecke et  
447 al., 2013, Port et al., 2015, Saito & Matsuura, 2013)). Crm1 can exist in two conformations:  
448 an unliganded extended, superhelical conformation, which is inhibitory to cargo and  
449 RanGTP binding, and a compact, ring-like conformation, which is stabilized by cooperative  
450 binding to cargo and RanGTP. Importantly, the FG-repeat fragment of *Hs* Nup214, which  
451 binds Crm1 cooperatively with RanGTP and cargo, interacts with the compact conformation  
452 of Crm1 at multiple sites, spanning the junction between the Crm1 N- and C-termini in a  
453 manner similar to an adhesive bandage (Port et al., 2015) (Fig. 7 Suppl. 1A). The *Hs*  
454 Nup214 FG repeats have therefore been described as a “molecular clamp” that can stabilize  
455 Crm1-RanGTP-cargo complex in the compact conformation (Port et al., 2015). However,  
456 from an energetic perspective, cooperative binding also implies that anything that stabilizes  
457 the Crm1 compact conformation (including a high-affinity NES) will correspondingly reinforce  
458 association of Crm1 with *Hs* Nup214 FG repeats. As a result, a sufficiently high-affinity NES  
459 cargo would be expected to stabilize interaction of Crm1 with Nup146, leading to docking of  
460 Crm1 (and the NES cargo itself) at the cytoplasmic face of the NPC (Fig. 7 Suppl. 1A).

461 In addition to a “high-affinity NES” mechanism, other factors may also contribute to  
462 docking of the Mto1/2 complex at the NPC. For example, if Mto1(or its partner Mto2) were to  
463 bind Nup146 independently of binding to Crm1, such multivalent binding would decrease the  
464 off-rate from the NPC; currently our MS data cannot distinguish between direct and indirect  
465 Mto1 interactors. Interactions between Mto1/2 and the NPC could also be stabilized by  
466 avidity effects. Mto1/2 is multimeric *in vivo*, containing multiple (>10) copies of both Mto1  
467 and Mto2 (Lynch et al., 2014), while nucleoporins are also present in multiple copies within  
468 the NPC, because of its eight-fold symmetry (Aitchison & Rout, 2012, Gorlich & Kutay, 1999,  
469 Wente & Rout, 2010). As a result, multiple Mto1 molecules in a single Mto1/2 complex could  
470 bind to multiple nucleoporins (and/or Crm1) in a single NPC. Interestingly, localization of  
471 Mto1/2 to the SPB and the CAR also depends on avidity effects (Samejima et al., 2010).

472

### 473 **Formation of an Crm1-dependent docking complex with a cytoplasmic “cargo”**

474 Given that conventional Crm1-dependent export complexes form in the nucleus,  
475 where RanGTP concentration is high (Aitchison & Rout, 2012, Gorlich & Kutay, 1999, Wente  
476 & Rout, 2010), how might an Mto1/2 docking complex form in the cytoplasm, where RanGTP  
477 concentration is low? We speculate that if the Mto1 NES-M acts as a high-affinity NES, it  
478 may be possible for Mto1/2 to replace a conventional nuclear export cargo at the final stages  
479 of export, via a “cargo-handover” mechanism (Fig. 7 Suppl. 1B). Alternatively, a docking  
480 complex involving Mto1/2, Crm1, Nup146 and RanGTP could in principle form *de novo* at  
481 the cytoplasmic face of the NPC. While the low concentration of RanGTP in the cytoplasm  
482 makes this unlikely, it is formally possible that in the immediate vicinity of the NPC, the local

483 concentration of RanGTP is higher than in the cytoplasm in general, because in yeast,  
484 RanGAP is freely soluble in the cytoplasm rather than associated with the NPC (Aitchison &  
485 Rout, 2012, Hopper et al., 1990). Accordingly, immediately after RanGTP dissociates from  
486 export complexes (but prior to GTP hydrolysis), it might be available to cytoplasmic Mto1/2.

487

#### 488 ***A novel function for cytoplasmic FG-Nups?***

489 In this work, we identified a very specific phenotype associated with deletion of  
490 Nup146 FG repeats 5-12: Mto1 is lost from NPCs, with a concomitant loss in MT nucleation  
491 from the NE. Moreover, this is correlated with a strong decrease in interaction of Mto1 with  
492 Nup146 and, to a lesser extent, with Crm1, consistent with our model of a cargo-like  
493 complex of Mto1/2, Crm1 and RanGTP docking at the cytoplasmic face of the NPC. In this  
494 context, it is interesting that extensive analysis in budding yeast has shown that the FG  
495 regions of cytoplasmic FG-Nups (as well as nucleoplasmic FG-Nups) can be deleted without  
496 almost any discernible effects on nuclear transport (Adams et al., 2014, Strawn et al., 2004,  
497 Zeitler & Weis, 2004). In human cells, the role of *Hs* Nup214 in protein export appears to be  
498 somewhat controversial (Bernad et al., 2006, Hutten & Kehlenbach, 2006); however, similar  
499 to budding yeast, in at least one instance where *Hs* Nup214 was found to be important for  
500 export—namely, export of the 60S pre-ribosome—the FG repeats of *Hs* Nup214 were found  
501 not to be required (Bernad et al., 2006)). Based on these results, and on the conservation of  
502 FG repeats in Nup146, *Sc* Nup159 and *Hs* Nup214, we propose that an important but  
503 previously unrecognized role for cytoplasmic FG-Nups may be to dock cytoplasmic proteins  
504 at the NPC for non-export-related functions, as described here for generation of non-  
505 centrosomal MTOCs by the Mto1/2 complex. It will be interesting to see how widespread this  
506 type of repurposing of the nuclear export machinery is in eukaryotic cells more generally.

507

508

## 509 **MATERIALS AND METHODS**

### 510 **Yeast cultures, strain and plasmid construction**

511 Fission yeast methods and growth media were as described (Forsburg & Rhind,  
512 2006, Petersen & Russell, 2016). Strains were normally grown in YE5S rich medium or PMG  
513 minimal medium (like EMM2, but using 5 g/L sodium glutamate acid instead of ammonium  
514 chloride as nitrogen source). For preliminary experiments using SILAC mass spectrometry,  
515 cells were grown in low-nitrogen EMM2 medium (“LowN”; using 0.3 g/L ammonium chloride  
516 as nitrogen source; (Bicho et al., 2010)). For purification of HTB-tagged Mto1 variants for  
517 LFQ MS, Mto1 variants were expressed from the *nmt81* promoter, and cells were grown in  
518 PMG medium, except for experiments involving leptomycin B (Fig. 3), in which case Mto1  
519 variants were expressed from the repressed *nmt1* promoter, and cells were grown in

520 4xYE5S medium. For electron microscopy, cells were grown in EMM2 minimal medium.  
521 Nutritional supplements were normally used at 175 mg/L, except for arginine and lysine in  
522 SILAC experiments, in which unlabeled arginine or L-<sup>13</sup>C<sub>6</sub>-arginine (Sigma Isotec) was  
523 used at 80 mg/L, and unlabeled lysine or L-<sup>13</sup>C<sub>6</sub><sup>15</sup>N<sub>2</sub>-lysine (Sigma Isotec) was used at 60  
524 mg/L (Bicho et al., 2010). Solid media contained 2% Bacto agar (Becton Dickinson). For  
525 mating, SPA plates containing 45 mg/L each of adenine, leucine, uracil, histidine and lysine  
526 were used. For repression of thiamine-regulated promoters, sterile-filtered thiamine was  
527 added to media at a final concentration of 15 μM.

528 Strains used in this study are listed in Supplementary File 1. For experiments  
529 purifying HTB-tagged Mto1 for LFQ MS, strains contained the *mto2[17A]* allele; this allele  
530 contains 17 phosphorylation sites in Mto2 mutated to alanine, which helps to stabilize the  
531 Mto1/2 complex (Borek et al., 2015). The *mto2[17A]* allele was also present in strains  
532 imaged in Figs. 1C and 4C (see Supplementary File 1).

533 Genetic crosses used either tetrad dissection or random spore analysis (Ekwall &  
534 Thon, 2017). Except for the cases described below, genome manipulations such as gene  
535 tagging, truncation and/or deletion were made by homologous recombination of PCR  
536 products (Bahler et al., 1998). PCR was performed with either Phusion High-Fidelity  
537 polymerase or Q5 High-Fidelity polymerase (NEB). Desired strains were confirmed by yeast  
538 colony PCR, western blot and/or fluorescence microscopy as appropriate. For all cloning  
539 experiments, *E. coli* strain DH5alpha was used.

540

#### 541 ***Leptomycin-resistant crm1 mutants***

542 To generate *crm1-C529A/S/T/V* mutants, a one-step approach was used, in which  
543 *mto1[9A1-NE]-GFP nup146-3mCherry* cells were transformed with mutated *crm1* DNA  
544 fragments and selected directly for leptomycin (LMB) resistance. Mutant *crm1* fragments  
545 were designed with the mutation site in the center, ~650 base pairs of *crm1* sequence on  
546 either side of the mutation site, and BstXI sites at each end of fragment. Plasmids  
547 containing the mutant fragments were synthesized by GeneArt. The *crm1* fragments were  
548 released from plasmids by BstXI digestion, purified and transformed into strain KS7255.  
549 Cells from the transformation were plated onto YE5S plates containing 300 nM LMB (LC  
550 Laboratories), and LMB-resistant colonies were easily identified. A negative-control  
551 transformation conducted in parallel did not yield any LMB-resistant colonies. Stable LMB-  
552 resistant colonies from each transformation were then used for sequencing to confirm  
553 specific mutations in *crm1* genomic DNA. The mutant strains were named KS9340 (*crm1-*  
554 *C529A*), KS9221 (*crm1-C529S*) KS9338 (*crm1-C529T*), and KS9336 (*crm1-C529V*)  
555

## 556 **Overexpression of wild-type and mutant *spi1***

557 Strains overexpressing *spi1+*, *spi1*[Q68L] and *spi1*[T23N] from the *nmt41* promoter  
558 were generated by targeted integration of transgenes at the *hph.171k* locus (Fennessy et al.,  
559 2014). First, pJET-*spi1+*/[Q68L]/[T23N] plasmids were constructed. To construct pJET-  
560 *spi1+*, *spi1+* genomic DNA was amplified from fission yeast genomic DNA using primer pair  
561 OKS3290/OKS3291, and the PCR product was ligated into vector pJET1.2 (Thermo Fisher  
562 Scientific). The resulting pJET-*spi1+* plasmid was confirmed by sequencing and named  
563 pKS1603. To construct pJET-*spi1*[Q68L], the Q68L mutation was introduced into pKS1603  
564 by PCR, using primer pair OKS3139/OKS3140. The PCR product was recircularized using  
565 T4 polynucleotide kinase and T4 DNA ligase. The resulting plasmid was confirmed by  
566 sequencing and named pKS1596. To construct pJET-*spi1*[T23N], pKS1603 was used as  
567 template to introduce the T23N mutation into the *spi1* sequence, using QuikChange Site-  
568 Directed Mutagenesis kit (Promega) and primer pair OKS 3336/OKS3337. After DpnI  
569 treatment and transformation, the resulting plasmid was confirmed by sequencing and  
570 named pKS1595.

571 Next, the *spi1* inserts from pKS1603, pKS1596, and pKS1595 were each subcloned  
572 into the fission yeast integration vector pINTH41 (Fennessy et al., 2014) after restriction  
573 digest with BamHI and NdeI. The resulting pINTH41-*spi1+*/[Q68L]/[T23N] plasmids were  
574 confirmed by restriction digest and named pKS1597, pKS1599, and pKS1598, respectively.

575 For transformation into fission yeast, pKS1597, pKS1599, and pKS1598 were  
576 digested with NotI, and the relevant fragments were purified and used to transform strain KS  
577 7742. Stable nourseothricin-resistant, hygromycin-sensitive integrants were identified,  
578 indicating replacement of the hygromycin-resistance marker at the *hph.171k* locus by the  
579 transgene. Colonies were then tested on PMG plates (also containing adenine and uracil)  
580 with or without 15  $\mu$ M thiamine. After two days of growth at 32°C, *nmt41:spi1+* colonies were  
581 similar with and without thiamine, while *nmt41:spi1*[Q68L] and *nmt41:spi1*[T23N] colonies  
582 appeared normal on plates with thiamine but formed only very tiny colonies on plates without  
583 thiamine. *nmt41: spi1+*/[Q68L]/[T23N] overexpression strains were named KS8578, KS8581  
584 and KS8580, respectively.

585

## 586 **Internal deletion of *nup146* FG repeats**

587 Strains with internal deletions of *nup146* FG repeats were constructed by a two-step  
588 approach (Fennessy et al., 2014). For the first step, an *rpl42:natMX6* cassette was amplified  
589 by PCR using primer pair OKS2460/OKS2461 and the PCR product was used to transform  
590 cycloheximide-resistant *rpl42.sP56Q* strain KS8072. The amplified cassette was at the end  
591 of the *nup146* coding sequence to generate a nourseothricin-resistant, cycloheximide-  
592 sensitive *nup146:rpl42:natMX6 rpl42.sP56Q* strain, which was named KS8254.



593 For the second step, a 5.1 kb wild-type *nup146* genomic DNA fragment (containing 5'  
594 and 3' untranslated regions as well as coding sequence) was amplified by PCR using primer  
595 pair OKS3063/OKS3067. The PCR product was ligated into pJET1.2 vector, and the  
596 resulting pJET-*nup146* plasmid was sequenced and named pKS1511. Internal deletions of  
597 FG repeats were made within pKS1511 by PCR, using primer pair OKS3093/OKS3094 to  
598 make *nup146* [ $\Delta$ FG5-12 $\Delta$ ]. The PCR product was recircularized using T4 polynucleotide  
599 kinase and T4 DNA ligase, and after transformation, the resulting plasmid was confirmed by  
600 sequencing. The pJET-*nup146* [ $\Delta$ FG5-12] genomic DNA plasmid was named pKS1514.

601 DNA sequence of *nup146* [ $\Delta$ FG5-12] was amplified from pKS1514 by PCR using  
602 primer pair OKS3098/OKS3099. The resulting PCR product was transformed into strain  
603 KS8254. Nourseothricin-sensitive, cycloheximide-resistant colonies were selected, and  
604 colony PCR using primer pair OKS3154/OKS3155 was used to identify the desired strains.  
605 The correct *nup146* [ $\Delta$ FG5-12] *rpl42.sP56Q* strains was named KS8305.

606

## 607 **Light microscopy**

### 608 ***General light microscopy conditions***

609 Unless stated otherwise, for live-cell microscopy, cells were grown in PMG medium  
610 supplemented with adenine, leucine and uracil, with glucose added after autoclaving. Before  
611 imaging, cells were grown for two days at 25°C, with appropriate dilution to maintain  
612 exponential growth. To prepare cells for imaging, 0.5-1 mL of cell culture was centrifuged at  
613 13,000 rpm for 30 s to pellet cells, and a small amount of cell pellet was placed on a pad of  
614 2% agarose in PMG medium supplemented with adenine, leucine and uracil, on a  
615 microscope slide. The preparation was then sealed with a coverslip and VALAP (Vaseline,  
616 lanolin, and paraffin wax in a 1:1:1 ratio). Preparations were used for ~10-40 min before  
617 being discarded.

618 All microscopy was performed on a spinning-disk confocal microscope, using a Nikon  
619 100x/1.45 NA Plan Apo objective and a Nikon TE2000 inverted microscope in a 25°C  
620 temperature-controlled box, attached to a Yokogawa CSU-10 spinning disk confocal unit  
621 (Visitech) and an Andor iXon+ Du888 EMCCD camera.

622 Images were acquired with a step size 0.6  $\mu$ m and 11 Z-sections for the full cell  
623 volume, except for imaging of GFP-tubulin, which used 7 Z-sections. Microscopy images  
624 were processed and analyzed by Metamorph (Molecular Devices) and Image J software.  
625 Only linear contrast enhancement was used. Unless otherwise indicated, images are  
626 presented as maximum projection of all 11 Z-sections. Images within the same panel in a  
627 given figure were all acquired and processed under identical conditions, and therefore signal  
628 intensities can be compared directly.

629

630 **LMB treatment**

631 For imaging after LMB treatment. LMB (from 10  $\mu$ M stock in ethanol) was added to  
632 cultures at 100 nM final concentration. For negative controls, ethanol alone was added to an  
633 equivalent final concentration (1% v/v). After incubation with or without LMB at 25°C, cells  
634 were mounted on medium-agarose pads containing 100 nM LMB and imaged as described  
635 above.

636

637 ***Spi1* expression**

638 For imaging after expression of *nmt41:spi1+*, *nmt41:spi1[Q68L]*, and  
639 *nmt41:spi1[T23N]*, cells were first grown to exponential phase in PMG medium containing  
640 adenine, leucine and uracil, plus 15  $\mu$ M thiamine to repress *nmt41:spi1* expression. Cells of  
641 each strain, as well as control cells lacking any *spi1* transgene, were centrifuged at 4000  
642 rpm for 4 min, washed three times with deionized water, resuspended in medium without  
643 thiamine, and grown at 25°C until imaging. Preliminary experiments indicated that at this  
644 temperature, expression was first noticeable ~26 h after washing, and more significant at 30-  
645 34 h after washing. Cells were therefore imaged after 26 h and 34 h incubation at 25°C.

646

647 ***Microtubule re-growth after cold-shock***

648 For microtubule regrowth experiments, cells were grown in YE5S liquid medium at  
649 25°C. Manipulations before and after cold-shock, including methanol fixation and processing  
650 for immunofluorescence, were performed exactly as described previously (Lynch et al.,  
651 2014). To assay regrowth after cold-shock, chilled cells were fixed at 34 s, 40 s, 55 s, 70 s, 3  
652 min, and 10 min after being returned to pre-warmed flasks in a 25°C water bath. Cells were  
653 stained with TAT1 mouse monoclonal anti-tubulin antibody (1:15 dilution of hybridoma  
654 culture supernatant) and Alexa488 Donkey anti-mouse secondary antibody (1:80 dilution;  
655 Thermo Fisher Scientific). Centrifugation of stained cells onto coverslips for imaging was as  
656 described (Sawin & Nurse, 1998).

657

658 ***GFP-tubulin live-cell imaging.***

659 For GFP-tubulin live-cell imaging of wild-type (*nup146+*) and *nup146[ $\Delta$ FG5-12]* cells,  
660 cells were imaged every 5 s for a total time of 100s. Quantification of MT nucleation in the  
661 vicinity of the cell nucleus and away from the cell nucleus was determined manually from  
662 videos. 90 cells were scored for each of the two genotypes.

663

664 **Immunoelectron microscopy**

665 Immunoelectron microscopy was carried out as described previously (Tange et al.,  
666 2016), with some modifications. Briefly, strain KS5750 (*mto1[9A1-NE]-GFP*) was cultured in

667 EMM2 medium with supplements. After washing with 0.1 M phosphate buffer (PB, pH7.4),  
668 cells were fixed for 20 min at room temperature with 4% formaldehyde and 0.01%  
669 glutaraldehyde dissolved in PB, and washed with PB three times for 5 min each. Cells were  
670 then treated with 0.5 mg/mL Zymolyase 100T (Seikagaku Co., Tokyo, Japan) in PB for 30  
671 min. Because the cell walls were not removed well, the cells were further treated with 1  
672 mg/mL Zymolyase 100T in PB for 30 min at 30°C, with 0.2 mg/ml Lysing Enzyme for 30 min,  
673 and washed with PB three times. After treatment with 100 mM lysine HCl in PB twice for 10  
674 min and subsequent washing with PB, cells were permeabilized for 15 min with PB  
675 containing 0.2% saponin and 1% bovine serum albumin (BSA), and incubated at 4°C  
676 overnight with primary antibody (rabbit polyclonal anti-GFP antibody; Rockland) diluted  
677 1:400 in PB containing 1% BSA and 0.01% saponin. After washing with PB containing  
678 0.005% saponin three times for 10 min each, cells were incubated for 2 hours at room  
679 temperature with secondary antibody (goat anti-rabbit Alexa 594 FluoroNanogold Fab'  
680 fragment, Nanoprobes, Yaphank, NY, USA) diluted 1:400 in PB containing 1% BSA and  
681 0.01% saponin, washed with PB containing 0.005% saponin three times for 10 min each,  
682 and with PB once. Then, the cells were fixed again with 1% glutaraldehyde in PB for 1 hour,  
683 washed with PB once and treated with 100 mM lysine HCl in PB twice for 10 min each. The  
684 cells were stored at 4°C until further use.

685         Before use, the cells were incubated with 50 mM HEPES (pH5.8) three times for 3  
686 min each, washed with distilled water (dH<sub>2</sub>O) once, and then incubated at 25°C for 3 min  
687 with the Silver enhancement reagent (an equal-volume mixture of the following solutions A,  
688 B and C: A. 0.2% silver acetate solution. B. 2.8% trisodium citrate-2H<sub>2</sub>O, 3% citric acid-H<sub>2</sub>O,  
689 and 0.5% hydroquinone. C. 300 mM HEPES, pH 8.2). Cells were then washed with dH<sub>2</sub>O  
690 three times. Cells were embedded in 2% low melting agarose dissolved in dH<sub>2</sub>O. Then, cells  
691 were post-fixed with 2% OsO<sub>4</sub> in dH<sub>2</sub>O for 15 min at room temperature, washed with dH<sub>2</sub>O  
692 three times, stained with 1% uranyl acetate in DW for 1 hour, and washed with dH<sub>2</sub>O three  
693 times.

694         Cells were dehydrated by sequential incubation in 50 and 100% ethanol for 10 min  
695 each, and with acetone for 10 min. For embedding in epoxy resin, cells were incubated  
696 sequentially with mixtures of acetone: Epon812 (1:1) for 1hr, acetone:Epon812 (1:2) for 1hr,  
697 and Epon812 overnight, and then Epon812 again for another 3 hours, and left to stand until  
698 solidified. The block containing cells was sectioned with a microtome (Leica Microsystems),  
699 and the ultra-thin sections were doubly stained with 4% uranyl acetate for 20 min and lead  
700 citrate (Sigma, Tokyo Japan) for 1 min as usually treated in EM methods. Images were  
701 obtained using a JEM1400 transmission electron microscope (JEOL, Tokyo, Japan)  
702 at 120kV.



703

## 704 **Biochemistry and mass spectrometry**

### 705 ***Cell harvesting and cryogrinding***

706 Cell cultures in late exponential growth were collected by centrifugation at 5000 rpm  
707 for 15 mins at 4°C in a JLA-8.1000 rotor (Beckman Coulter). Cell pellets were resuspended  
708 in one-quarter culture volume of wash buffer (10mM NaPO<sub>4</sub> pH 7.5 and 0.5 mM EDTA) and  
709 then washed three times by centrifugation at 5000 rpm for 15 mins at 4°C in a JLA-10.500  
710 rotor (Beckman Coulter) and resuspension in the same volume of wash buffer. After the final  
711 centrifugation, the cell pellet was weighed and resuspended in wash buffer, using a ratio of  
712 0.3 mL wash buffer per gram of cell pellet. The cell suspension was then quick-frozen by  
713 drop-wise addition into liquid nitrogen and stored at -80°C until further use.

714 Cryogrinding was performed using an RM100 electric mortar grinder with a zirconium  
715 oxide mortar and pestle (Retsch). The mortar and pestle were pre-cooled by filling with liquid  
716 nitrogen for 10 min before grinding. Frozen cells were then added into the pre-cooled grinder  
717 and ground for 40 min, with regular generous addition of liquid nitrogen to maintain the  
718 temperature and prevent cell clumping during the grinding process. Cryogrindate cell powder  
719 was recovered and stored at -80°C until further use.

720

### 721 ***Anti-GFP immunoprecipitation (for preliminary SILAC interactome analysis)***

722 Large-scale anti-GFP immunoprecipitation was performed using homemade sheep  
723 anti-GFP antibody covalently coupled to Protein G Dynabeads (Thermo Fisher Scientific)  
724 using dimethylpimelidate (Borek et al., 2015). Immunoprecipitation (IP) buffer contained  
725 15 mM NaPO<sub>4</sub> pH 7.5, 100 mM KCl, 0.5 mM EDTA, 0.2% TX-100, 10 µg/mL CLAAPE  
726 protease inhibitors (chymostatin, leupeptin, antipain dihydrochloride, aprotinin, pepstatin, E-  
727 64), 2 mM AEBSF, 2 mM PMSF, 1 mM NaF, 50 nM calyculin A, 50 nM okadaic acid, 0.1 mM  
728 Na<sub>3</sub>VO<sub>4</sub>, and 2 mM benzamidine.

729 After SILAC labeling, cell harvesting and cryogrinding, 37 g of cell cryogrindate  
730 powder was mixed with 66.6 ml of cold (4°C) IP buffer and vortexed until dissolved. Cell  
731 lysate was then centrifuged at 13,000 rpm for 15 min at 4°C to remove most of the cell  
732 debris. The supernatant was transferred to a fresh tube and centrifuged again at 13,000 rpm  
733 for 15 min at 4°C, and the second supernatant was recovered. Protein concentration of  
734 clarified lysates was measured by Bradford assay and then normalized by adding  
735 appropriate volume of IP buffer as necessary.

736 For immunoprecipitation, 140 µL of anti-GFP/Protein G-Dynabead slurry (~2.1x10<sup>9</sup>  
737 beads, coupled to ~85 µg of antibody) were washed twice with 0.5 mL of IP buffer, mixed  
738 with 70 mL of clarified cell lysate, and incubated at 4°C for 1.5 h with gentle rotation. Beads  
739 were then collected with a magnet, washed three times with 1 mL IP buffer, transferred to a

740 fresh microfuge tube, and washed twice again with 1 mL IP buffer. The beads were then  
741 centrifuged at 13,000 rpm for 10 s, and any remaining buffer was removed.

742 To elute proteins from beads, a total of 65  $\mu$ L Laemmli sample buffer (LSB; 2% SDS  
743 (v/v), 10% glycerol, 62.5 mM Tris pH 6.8) was added to beads, which were then mixed by  
744 pipetting and incubated at 65°C for 15 min with intermittent vortexing. The mixture was then  
745 briefly centrifuged before transferring the supernatant to a fresh microfuge tube, and DTT  
746 and bromophenol blue were added to final concentrations of 0.1 M and 0.01%, respectively.  
747 This final sample was then heated at 95°C for 5 min and stored at -20°C prior to SDS-PAGE.

748 Samples from large-scale immunoprecipitations were processed for SILAC mass  
749 spectrometry analysis as described below.

750

### 751 ***Cryogrindate cross-linking in vitro***

752 A 0.125 M stock solution of disuccinimidyl suberate (DSS; Thermo Fisher Scientific)  
753 was made fresh in DMSO. Just before cross-linking, this was diluted to 2.5 mM final  
754 concentration in cross-linking buffer (15 mM NaPO<sub>4</sub> pH 7.5, 85 mM NaCl, 0.2% Triton X-  
755 100, 1 mM PMSF, 10  $\mu$ g/mL CLAAPE protease inhibitors, 2 mM AEBSF, 1 mM NaF, 50 nM  
756 okadaic acid, 0.1 mM Na<sub>3</sub>VO<sub>4</sub> and 2 mM benzamidine). 6 g of cell cryogrindate powder was  
757 resuspended in 6 mL of cross-linking buffer containing DSS and mixed by vortexing. Cell  
758 lysate was then incubated at 4°C for 2 h with gentle rotation. Then, 1.2 mL of 1.5 M Tris-HCl  
759 pH 8.8 was added to the cell lysate to quench the cross-linking reaction, and left at room  
760 temperature for 30 min. The cross-linked cell lysate was then used for two-step purification  
761 as described below.

762

### 763 ***Two-step purification of HTB-tagged Mto1 variants***

764 HTB-tagged Mto1 variants were purified in two steps, using nickel-charged Fractogel  
765 EMD Chelate (M) (Merck) resin and Nanolink magnetic streptavidin beads (Solulink), under  
766 denaturing conditions. The procedure described below was used for purifications after  
767 cryogrindate cross-linking *in vitro*, which was most commonly used. For purifications after  
768 cross-linking *in vivo*, the same approach was used, but all amounts and volumes were  
769 doubled (this is because initial purifications were done after cross-linking *in vivo*, and it was  
770 later determined that half as much material was still sufficient for MS analysis)

771 For the first-step purification, 12 mL of cross-linked and quenched cell lysate  
772 (representing 6 g cryogrindate) was mixed with 60 mL guanidine purification buffer (6 M  
773 guanidine, 15 mM NaPO<sub>4</sub> pH 7.5, 85 mM NaCl, 0.5% TritonX-100, 1 mM PMSF, 1 mM NaF,  
774 0.1 mM Na<sub>3</sub>VO<sub>4</sub> and 2 mM benzamidine). The cell lysate was then sonicated with a Sonics  
775 VC505 sonicator fitted with a 3mm tip for 2 min (1 s on, 1 s off, for total time 4 min, at 60%  
776 amplification), centrifuged at 4,000 rpm for 15 min at room temperature to remove cell

777 debris, and the supernatant was recovered. 1.2 mL of 50% slurry of Fractogel EMD Chelate  
778 (henceforth referred to as “Fractogel”) was charged with nickel and washed twice with 5 mL  
779 distilled water, and twice with 5 mL guanidine purification buffer. The charged Fractogel bed  
780 was resuspended with an equal volume of 6 M guanidine purification buffer and mixed with  
781 the lysate supernatant and incubated at room temperature for 2 h, with gentle rotation. The  
782 suspension was then transferred to a 20 mL disposable plastic column (Evergreen  
783 Scientific), washed once with 20 mL of 6 M guanidine purification buffer, and washed 3 times  
784 with 20 mL of 8M urea purification buffer (contained 8 M urea, 15 mM NaPO<sub>4</sub> pH 7.5, 85 mM  
785 NaCl, 0.1% TritonX-100, 1 mM PMSF, 1 mM NaF, 0.1 mM Na<sub>3</sub>VO<sub>4</sub> and 2 mM benzamidine).  
786 The Fractogel was then resuspended in 1 mL of 8 M urea purification buffer and transferred  
787 into a 15 mL polypropylene tube. This process was repeated for 2 more times to recover all  
788 of the Fractogel from the column. Fractogel was then centrifuged at 4,000 rpm for 3 min at  
789 RT. The supernatant was discarded, and 3 mL of LSB containing 600 mM imidazole was  
790 added to the tube, and bound proteins were eluted by heating at 95°C for 5 min. The  
791 Fractogel was then centrifuged at 4,000 rpm for 3 min, and the supernatant was recovered,  
792 quick-frozen in liquid nitrogen, and stored at -80°C.

793 For the second-step purification, the stored elution from the first-step purification  
794 above was thawed at room temperature, and TX-100 was added to a final concentration of  
795 1%. 30 µL of Nanolink streptavidin beads slurry (as supplied by manufacturer; this  
796 corresponds to ~1.2 µL bed volume) was washed twice with 1 mL of LSB containing 1% TX-  
797 100, resuspended into 30 µL of LSB containing 1% TX-100 and added to the thawed first-  
798 step elution. This suspension was incubated for 1.5 h at room temperature, then collected  
799 with a magnet and washed once with 1 mL of LSB and three times with 1 mL of LSB without  
800 glycerol. After transfer to a microfuge tube, beads were resuspended in 15 µL of LSB and  
801 heated at 95°C for 5 min. The elution from the beads was collected and DTT and  
802 bromophenol blue were added, to final concentrations of 0.1M and 0.01%, respectively. The  
803 mixture was boiled again for 5 min and stored at -20°C prior to SDS-PAGE.

804

### 805 ***Mass spectrometry (label-free quantification)***

806 For label-free quantification mass spectrometry analysis of samples after two-step  
807 purification, ~18 µL of second-step elution was loaded onto a single lane (~0.5 cm wide) of a  
808 4-20% Tris-glycine polyacrylamide gel (Biorad). Samples were run at 150V for 12-14 min.  
809 The gel was stained with Coomassie Blue at room temperature for 1 h and destained in 10%  
810 acetic acid overnight. On the following day, the gel was washed once in distilled water and  
811 the relevant region recovered after excision with a clean scalpel. In general, for all samples,  
812 we recovered the region of the gel above, but not including, the non-cross-linked Mto1 band,

813 in order to increase the relative proportion of cross-linked Mto1 species vs. non-crosslinked  
814 Mto1.

815 Excised gel bands were destained with 50mM ammonium bicarbonate (Sigma  
816 Aldrich, UK) and 100% (v/v) acetonitrile (Sigma Aldrich, UK) and proteins were digested with  
817 trypsin, as previously described (Shevchenko et al., 1996). In brief, proteins were reduced in  
818 10 mM dithiothreitol (Sigma Aldrich, UK) for 30 min at 37°C and alkylated in 55 mM  
819 iodoacetamide (Sigma Aldrich, UK) for 20 min at ambient temperature in the dark. They  
820 were then digested overnight at 37°C with 13 ng/μL trypsin (Pierce, UK).

821 Following digestion, samples were diluted with an equal volume of 0.1% TFA and  
822 spun onto StageTips as described (Rappsilber et al., 2003). Peptides were eluted in 40 μL of  
823 80% acetonitrile in 0.1% TFA and concentrated to 1 μL by vacuum centrifugation  
824 (Concentrator 5301, Eppendorf, UK). Samples were then prepared for LC-MS/MS analysis  
825 by diluting to 5 μL with 0.1% TFA. LC-MS-analyses were performed on a Q Exactive mass  
826 spectrometer (Thermo Fisher Scientific, UK) (Figures 1, 3, and 6) and on an Orbitrap  
827 Fusion™ Lumos™ Tribrid™ Mass Spectrometer (Thermo Fisher Scientific, UK) (Figure 4),  
828 both coupled on-line to Ultimate 3000 RSLCnano Systems (Dionex, Thermo Fisher  
829 Scientific, UK). Peptides were separated on a 50 cm EASY-Spray column (Thermo  
830 Scientific, UK) assembled in an EASY-Spray source (Thermo Scientific, UK) and operated at  
831 50°C. In both cases, mobile phase A consisted of 0.1% formic acid in water while mobile  
832 phase B consisted of 80% acetonitrile and 0.1% formic acid. Peptides were loaded onto the  
833 column at a flow rate of 0.3 μL/min and eluted at a flow rate of 0.2 μL/min according to the  
834 following gradients: 2 to 40% buffer B in 90 min, then to 95% buffer B in 11 min (Figures 1, 3  
835 and 4) and 2 to 40% buffer B in 120 min and then to 95% buffer B in 11 min (Figure 6). For  
836 Q Exactive, FTMS spectra were recorded at 70,000 resolution (scan range 350-1400 m/z)  
837 and the ten most intense peaks with charge ≥ 2 of the MS scan were selected with an  
838 isolation window of 2.0 Thomson for MS2 (filling 1.0E6 ions for MS scan, 5.0E4 ions for  
839 MS2, maximum fill time 60 ms, dynamic exclusion for 50 s). For Orbitrap Fusion Lumos,  
840 survey scans were performed at 60,000 resolution (scan range 350-1400 m/z) with an ion  
841 target of 7.0e5. MS2 was performed in the orbitrap with ion target of 5.0E3 and HCD  
842 fragmentation with normalized collision energy of 25 (Olsen et al., 2007). The isolation  
843 window in the quadrupole was 1.6. Only ions with charge between 2 and 7 were selected for  
844 MS2.

845 The MaxQuant software platform (Cox & Mann, 2008) version 1.5.2.8 was used to  
846 process raw files, and search was conducted against *Schizosaccharomyces pombe*  
847 complete/reference proteome set from PomBase ([www.pombase.org](http://www.pombase.org); released in July,  
848 2016), using the Andromeda search engine (Cox et al., 2011). The first search peptide  
849 tolerance was set to 20 ppm while the main search peptide tolerance was set to 4.5 ppm.

850 Isotope mass tolerance was set to 2 ppm, and maximum charge state was set to 7.  
851 Maximum of two missed cleavages were allowed. Carbamidomethylation of cysteine was set  
852 as fixed modification. Oxidation of methionine and acetylation of the N-terminal were set as  
853 variable modifications. Label-free quantification analysis was performed by employing the  
854 MaxLFQ algorithm as described (Cox et al., 2014). Peptide and protein identifications were  
855 filtered to 1% FDR.

856 All LFQ MS was performed using two complete biological replicates of each of the  
857 two conditions being compared. For experiments shown in Fig. 6, additional biological  
858 replicates using cells grown in LowN medium were also performed, alongside those using  
859 cells grown in PMG (as normal). Including the LowN replicates during MaxQuant analysis  
860 improved the quality of peptide identifications from experiments using cells grown in PMG.  
861 Data shown in Fig. 6 are only from cells grown in PMG; however, data from cells grown in  
862 LowN are completely consistent with the data from cells grown in PMG and are included with  
863 the PMG data as part of Supplementary File 6.

864 Scatterplots showing LFQ ratio vs. LFQ intensity (Figs. 1, 3, 4, 6) were constructed  
865 as follows: In cases where the relevant Mto1-interactors (e.g. Crm1, Nup146) were fully  
866 quantified in both conditions of both replicate experiments (i.e. Figs. 3 & 6), the values  
867 shown in scatterplots represent the geometric mean from the two replicates. The geometric  
868 mean was used rather than the arithmetic mean in order to minimize any effects of extreme  
869 outliers. In other cases (i.e. Figs. 1 & 4), Nup146 was not fully quantified in one of the  
870 conditions of one of the replicate experiments, because of low signal intensity or low peptide  
871 count. In these cases, it was not possible to calculate mean LFQ values for Nup146 from  
872 replicate experiments, and therefore, the values shown in scatterplots are taken from the  
873 replicate in which the Nup146 was fully quantified. Summary tables showing peptide counts  
874 and LFQ values from all replicate experiments are shown in Supplementary Figures, and full  
875 datasets, including LFQ values, are provided in Supplementary Files.

876

### 877 **Mass spectrometry (SILAC)**

878 To generate the SILAC data shown in Supplementary File 2 (preliminary results, from  
879 anti-GFP immunoprecipitation), sample processing and digestion was performed as  
880 described above. LC-MS analyses were performed on a Q Exactive mass spectrometer  
881 (Thermo Fisher Scientific, UK) coupled on-line, to Ultimate 3000 RSLCnano Systems  
882 (Dionex, Thermo Fisher Scientific, UK). The analytical column with a self-assembled particle  
883 frit (Ishihama et al., 2002) and C18 material (ReproSil-Pur C18-AQ 3 µm; Dr. Maisch,  
884 GmbH, Germany) was packed into a spray emitter (75-µm ID, 8-µm opening, 300-mm  
885 length; New Objective) using an air-pressure pump (Proxeon Biosystems, USA). Mobile  
886 phase A consisted of 0.1% formic acid in water while mobile phase B consisted of 80%



887 acetonitrile and 0.1% formic acid. Peptides were loaded onto the column at a flow rate of 0.5  
888  $\mu\text{L}/\text{min}$  and eluted at a flow rate of 0.2  $\mu\text{L}/\text{min}$  according to the following gradient: 2 to 40% in  
889 120 min and then to 95% in 11 min. The settings on the Q Exactive were the same as  
890 described above.

891 The MaxQuant software platform (Cox & Mann, 2008) version 1.3.0.5 was used to  
892 process raw files, and search was conducted against *Schizosaccharomyces pombe*  
893 complete/reference proteome set from PomBase (released in August, 2012), using the  
894 Andromeda search engine (Cox et al., 2011). The first search peptide tolerance was set to  
895 20 ppm, while the main search peptide tolerance was set to 4.5 ppm. Isotope mass  
896 tolerance was 2 ppm and maximum charge was set to 7. The MS/MS match tolerance was  
897 set to 20 ppm, and two missed cleavages were allowed. Carbamidomethylation of cysteine  
898 was set as fixed modification, and oxidation of methionine with acetylation of the N-terminal  
899 were set as variable modifications. Multiplicity was set to 2, and for heavy labels, Arginine-6  
900 and Lysine-8 were selected, and peptide and protein identifications were filtered to 1% FDR.  
901 Unique and non-unique peptides were used for quantification. Proteins with minimum of two  
902 quantified labeled peptide pairs/triplets were reported for quantification, and the isoforms  
903 with the highest peptide counts were considered for quantification.

904

## 905 **ACKNOWLEDGEMENTS**

906 We thank I. Hagan, S. Oliferenko, M. Sato, and K. Weis for yeast strains, plasmids and/or  
907 reagents. We thank members of our labs for helpful discussions, and A. Cook for insights on  
908 nuclear transport and for comments on the manuscript. This work was supported by the  
909 Wellcome Trust ([094517] to KES, and [108504], [091020] to JR), and by KAKENHI grants  
910 from the Japan Society for the Promotion of Science (JP25116006 and JP17H03636 to TH,  
911 and JP17H01444 and JP16H01309 to YH). XXB was also supported by the Darwin Trust of  
912 Edinburgh. The Wellcome Centre for Cell Biology is supported by core funding from the  
913 Wellcome Trust [203149].

914

## 915 **REFERENCES**

- 916 Adachi Y, Yanagida M (1989) Higher order chromosome structure is affected by cold-  
917 sensitive mutations in a *Schizosaccharomyces pombe* gene *crm1+* which encodes a 115-  
918 kD protein preferentially localized in the nucleus and its periphery. *J Cell Biol* 108: 1195-  
919 207
- 920 Adams RL, Terry LJ, Wentz SR (2014) Nucleoporin FG domains facilitate mRNP remodeling  
921 at the cytoplasmic face of the nuclear pore complex. *Genetics* 197: 1213-24
- 922 Aitchison JD, Rout MP (2012) The yeast nuclear pore complex and transport through it.  
923 *Genetics* 190: 855-83
- 924 Allen NP, Patel SS, Huang L, Chalkley RJ, Burlingame A, Lutzmann M, Hurt EC, Rexach M  
925 (2002) Deciphering networks of protein interactions at the nuclear pore complex. *Mol Cell*  
926 *Proteomics* 1: 930-46

- 927 Ambrose C, Wasteney GO (2014) Microtubule initiation from the nuclear surface controls  
928 cortical microtubule growth polarity and orientation in *Arabidopsis thaliana*. *Plant Cell*  
929 *Physiol* 55: 1636-45
- 930 Arnaoutov A, Azuma Y, Ribbeck K, Joseph J, Boyarchuk Y, Karpova T, McNally J, Dasso M  
931 (2005) Crm1 is a mitotic effector of Ran-GTP in somatic cells. *Nat Cell Biol* 7: 626-32
- 932 Asakawa H, Yang HJ, Yamamoto TG, Ohtsuki C, Chikashige Y, Sakata-Sogawa K,  
933 Tokunaga M, Iwamoto M, Hiraoka Y, Haraguchi T (2014) Characterization of nuclear pore  
934 complex components in fission yeast *Schizosaccharomyces pombe*. *Nucleus* 5: 149-62
- 935 Askjaer P, Bachi A, Wilm M, Bischoff FR, Weeks DL, Ogniewski V, Ohno M, Niehrs C,  
936 Kjems J, Mattaj IW, Fornerod M (1999) RanGTP-regulated interactions of CRM1 with  
937 nucleoporins and a shuttling DEAD-box helicase. *Mol Cell Biol* 19: 6276-85
- 938 Bahler J, Wu JQ, Longtine MS, Shah NG, McKenzie A, 3rd, Steever AB, Wach A, Philippsen  
939 P, Pringle JR (1998) Heterologous modules for efficient and versatile PCR-based gene  
940 targeting in *Schizosaccharomyces pombe*. *Yeast* 14: 943-51
- 941 Bai SW, Rouquette J, Umeda M, Faigle W, Loew D, Sazer S, Doye V (2004) The fission  
942 yeast Nup107-120 complex functionally interacts with the small GTPase Ran/Spi1 and is  
943 required for mRNA export, nuclear pore distribution, and proper cell division. *Mol Cell Biol*  
944 24: 6379-92
- 945 Bartolini F, Gundersen GG (2006) Generation of noncentrosomal microtubule arrays. *J Cell*  
946 *Sci* 119: 4155-63
- 947 Bernad R, Engelsma D, Sanderson H, Pickersgill H, Fornerod M (2006) Nup214-Nup88  
948 nucleoporin subcomplex is required for CRM1-mediated 60 S preribosomal nuclear  
949 export. *J Biol Chem* 281: 19378-86
- 950 Bicho CC, de Lima Alves F, Chen ZA, Rappsilber J, Sawin KE (2010) A genetic engineering  
951 solution to the "arginine conversion problem" in stable isotope labeling by amino acids in  
952 cell culture (SILAC). *Mol Cell Proteomics* 9: 1567-77
- 953 Bischoff FR, Klebe C, Kretschmer J, Wittinghofer A, Ponstingl H (1994) RanGAP1 induces  
954 GTPase activity of nuclear Ras-related Ran. *Proc Natl Acad Sci U S A* 91: 2587-91
- 955 Borek WE, Grocock LM, Samejima I, Zou J, de Lima Alves F, Rappsilber J, Sawin KE  
956 (2015) Mto2 multisite phosphorylation inactivates non-spindle microtubule nucleation  
957 complexes during mitosis. *Nat Commun* 6: 7929
- 958 Bugnard E, Zaal KJ, Ralston E (2005) Reorganization of microtubule nucleation during  
959 muscle differentiation. *Cell Motil Cytoskeleton* 60: 1-13
- 960 Cavazza T, Vernos I (2015) The RanGTP Pathway: From Nucleo-Cytoplasmic Transport to  
961 Spindle Assembly and Beyond. *Front Cell Dev Biol* 3: 82
- 962 Chang F, Martin SG (2009) Shaping fission yeast with microtubules. *Cold Spring Harb*  
963 *Perspect Biol* 1: a001347
- 964 Chen XQ, Du X, Liu J, Balasubramanian MK, Balasundaram D (2004) Identification of genes  
965 encoding putative nucleoporins and transport factors in the fission yeast  
966 *Schizosaccharomyces pombe*: a deletion analysis. *Yeast* 21: 495-509
- 967 Choi YK, Liu P, Sze SK, Dai C, Qi RZ (2010) CDK5RAP2 stimulates microtubule nucleation  
968 by the gamma-tubulin ring complex. *J Cell Biol* 191: 1089-95
- 969 Clarke PR, Klebe C, Wittinghofer A, Karsenti E (1995) Regulation of Cdc2/cyclin B activation  
970 by Ran, a Ras-related GTPase. *J Cell Sci* 108 ( Pt 3): 1217-25
- 971 Cox J, Hein MY, Lubner CA, Paron I, Nagaraj N, Mann M (2014) Accurate proteome-wide  
972 label-free quantification by delayed normalization and maximal peptide ratio extraction,  
973 termed MaxLFQ. *Mol Cell Proteomics* 13: 2513-26
- 974 Cox J, Mann M (2008) MaxQuant enables high peptide identification rates, individualized  
975 p.p.b.-range mass accuracies and proteome-wide protein quantification. *Nat Biotechnol*  
976 26: 1367-72
- 977 Cox J, Neuhauser N, Michalski A, Scheltema RA, Olsen JV, Mann M (2011) Andromeda: a  
978 peptide search engine integrated into the MaxQuant environment. *J Proteome Res* 10:  
979 1794-805
- 980 Daga RR, Chang F (2005) Dynamic positioning of the fission yeast cell division plane. *Proc*  
981 *Natl Acad Sci U S A* 102: 8228-32

- 982 Dasso M, Seki T, Azuma Y, Ohba T, Nishimoto T (1994) A mutant form of the Ran/TC4  
983 protein disrupts nuclear function in *Xenopus laevis* egg extracts by inhibiting the RCC1  
984 protein, a regulator of chromosome condensation. *Embo J* 13: 5732-44
- 985 Dong X, Biswas A, Suel KE, Jackson LK, Martinez R, Gu H, Chook YM (2009) Structural  
986 basis for leucine-rich nuclear export signal recognition by CRM1. *Nature* 458: 1136-41
- 987 Ekwall K, Thon G (2017) Genetic Analysis of *Schizosaccharomyces pombe*. Cold Spring  
988 Harb Protoc 2017: pdb top079772
- 989 Engelsma D, Bernad R, Calafat J, Fornerod M (2004) Supraphysiological nuclear export  
990 signals bind CRM1 independently of RanGTP and arrest at Nup358. *Embo J* 23: 3643-52
- 991 Engelsma D, Valle N, Fish A, Salome N, Almendral JM, Fornerod M (2008) A  
992 supraphysiological nuclear export signal is required for parvovirus nuclear export. *Mol*  
993 *Biol Cell* 19: 2544-52
- 994 Erhardt M, Stoppin-Mellet V, Campagne S, Canaday J, Mutterer J, Fabian T, Sauter M,  
995 Muller T, Peter C, Lambert AM, Schmit AC (2002) The plant Spc98p homologue  
996 colocalizes with gamma-tubulin at microtubule nucleation sites and is required for  
997 microtubule nucleation. *J Cell Sci* 115: 2423-31
- 998 Fant X, Srsen V, Espigat-Georger A, Merdes A (2009) Nuclei of non-muscle cells bind  
999 centrosome proteins upon fusion with differentiating myoblasts. *PLoS One* 4: e8303
- 1000 Fennessy D, Grallert A, Krapp A, Cokoja A, Bridge AJ, Petersen J, Patel A, Tallada VA,  
1001 Boke E, Hodgson B, Simanis V, Hagan IM (2014) Extending the *Schizosaccharomyces*  
1002 *pombe* molecular genetic toolbox. *PLoS One* 9: e97683
- 1003 Forbes DJ, Travesa A, Nord MS, Bernis C (2015) Nuclear transport factors: global regulation  
1004 of mitosis. *Curr Opin Cell Biol* 35: 78-90
- 1005 Fornerod M, Ohno M, Yoshida M, Mattaj IW (1997a) CRM1 is an export receptor for leucine-  
1006 rich nuclear export signals. *Cell* 90: 1051-60
- 1007 Fornerod M, van Deursen J, van Baal S, Reynolds A, Davis D, Murti KG, Fransen J,  
1008 Grosveld G (1997b) The human homologue of yeast CRM1 is in a dynamic subcomplex  
1009 with CAN/Nup214 and a novel nuclear pore component Nup88. *Embo J* 16: 807-16
- 1010 Forsburg SL, Rhind N (2006) Basic methods for fission yeast. *Yeast* 23: 173-83
- 1011 Fukuda M, Asano S, Nakamura T, Adachi M, Yoshida M, Yanagida M, Nishida E (1997)  
1012 CRM1 is responsible for intracellular transport mediated by the nuclear export signal.  
1013 *Nature* 390: 308-11
- 1014 Fung HY, Chook YM (2014) Atomic basis of CRM1-cargo recognition, release and inhibition.  
1015 *Semin Cancer Biol* 27: 52-61
- 1016 Fung HY, Fu SC, Brautigam CA, Chook YM (2015) Structural determinants of nuclear export  
1017 signal orientation in binding to exportin CRM1. *Elife* 4
- 1018 Fung HY, Fu SC, Chook YM (2017) Nuclear export receptor CRM1 recognizes diverse  
1019 conformations in nuclear export signals. *Elife* 6
- 1020 Gorlich D, Kutay U (1999) Transport between the cell nucleus and the cytoplasm. *Annu Rev*  
1021 *Cell Dev Biol* 15: 607-60
- 1022 Gorsch LC, Dockendorff TC, Cole CN (1995) A conditional allele of the novel repeat-  
1023 containing yeast nucleoporin RAT7/NUP159 causes both rapid cessation of mRNA export  
1024 and reversible clustering of nuclear pore complexes. *J Cell Biol* 129: 939-55
- 1025 Goshima G, Mayer M, Zhang N, Stuurman N, Vale RD (2008) Augmin: a protein complex  
1026 required for centrosome-independent microtubule generation within the spindle. *J Cell*  
1027 *Biol* 181: 421-9
- 1028 Guttler T, Gorlich D (2011) Ran-dependent nuclear export mediators: a structural  
1029 perspective. *Embo J* 30: 3457-74
- 1030 Guttler T, Madl T, Neumann P, Deichsel D, Corsini L, Monecke T, Ficner R, Sattler M,  
1031 Gorlich D (2010) NES consensus redefined by structures of PKI-type and Rev-type  
1032 nuclear export signals bound to CRM1. *Nat Struct Mol Biol* 17: 1367-76
- 1033 Hopper AK, Traglia HM, Dunst RW (1990) The yeast RNA1 gene product necessary for  
1034 RNA processing is located in the cytosol and apparently excluded from the nucleus. *J*  
1035 *Cell Biol* 111: 309-21



- 1036 Hutten S, Kehlenbach RH (2006) Nup214 is required for CRM1-dependent nuclear protein  
1037 export in vivo. *Mol Cell Biol* 26: 6772-85
- 1038 Hutten S, Kehlenbach RH (2007) CRM1-mediated nuclear export: to the pore and beyond.  
1039 *Trends Cell Biol* 17: 193-201
- 1040 Ishihama Y, Rappsilber J, Andersen JS, Mann M (2002) Microcolumns with self-assembled  
1041 particle frits for proteomics. *J Chromatogr A* 979: 233-9
- 1042 Janski N, Masoud K, Batzenschlager M, Herzog E, Evrard JL, Houlne G, Bourge M,  
1043 Chaboute ME, Schmit AC (2012) The GCP3-interacting proteins GIP1 and GIP2 are  
1044 required for gamma-tubulin complex protein localization, spindle integrity, and  
1045 chromosomal stability. *Plant Cell* 24: 1171-87
- 1046 Janson ME, Setty TG, Paoletti A, Tran PT (2005) Efficient formation of bipolar microtubule  
1047 bundles requires microtubule-bound gamma-tubulin complexes. *J Cell Biol* 169: 297-308
- 1048 Kalab P, Heald R (2008) The RanGTP gradient - a GPS for the mitotic spindle. *J Cell Sci*  
1049 121: 1577-86
- 1050 Kapitein LC, Hoogenraad CC (2015) Building the Neuronal Microtubule Cytoskeleton.  
1051 *Neuron* 87: 492-506
- 1052 Kehlenbach RH, Dickmanns A, Kehlenbach A, Guan T, Gerace L (1999) A role for RanBP1  
1053 in the release of CRM1 from the nuclear pore complex in a terminal step of nuclear  
1054 export. *J Cell Biol* 145: 645-57
- 1055 Klebe C, Bischoff FR, Ponstingl H, Wittinghofer A (1995) Interaction of the nuclear GTP-  
1056 binding protein Ran with its regulatory proteins RCC1 and RanGAP1. *Biochemistry* 34:  
1057 639-47
- 1058 Knauer SK, Bier C, Habtemichael N, Stauber RH (2006) The Survivin-Crm1 interaction is  
1059 essential for chromosomal passenger complex localization and function. *EMBO Rep* 7:  
1060 1259-65
- 1061 Kollman JM, Merdes A, Mourey L, Agard DA (2011) Microtubule nucleation by gamma-  
1062 tubulin complexes. *Nat Rev Mol Cell Biol* 12: 709-21
- 1063 Kornbluth S, Dasso M, Newport J (1994) Evidence for a dual role for TC4 protein in  
1064 regulating nuclear structure and cell cycle progression. *J Cell Biol* 125: 705-19
- 1065 Koyama M, Matsuura Y (2012) Mechanistic insights from the recent structures of the CRM1  
1066 nuclear export complex and its disassembly intermediate. *Biophysics (Nagoya-shi)* 8:  
1067 145-50
- 1068 Kraemer D, Wozniak RW, Blobel G, Radu A (1994) The human CAN protein, a putative  
1069 oncogene product associated with myeloid leukemogenesis, is a nuclear pore complex  
1070 protein that faces the cytoplasm. *Proc Natl Acad Sci U S A* 91: 1519-23
- 1071 Kraemer DM, Strambio-de-Castillia C, Blobel G, Rout MP (1995) The essential yeast  
1072 nucleoporin NUP159 is located on the cytoplasmic side of the nuclear pore complex and  
1073 serves in karyopherin-mediated binding of transport substrate. *J Biol Chem* 270: 19017-  
1074 21
- 1075 Kudo N, Matsumori N, Taoka H, Fujiwara D, Schreiner EP, Wolff B, Yoshida M, Horinouchi  
1076 S (1999) Leptomycin B inactivates CRM1/exportin 1 by covalent modification at a  
1077 cysteine residue in the central conserved region. *Proc Natl Acad Sci U S A* 96: 9112-7
- 1078 Kutay U, Guttinger S (2005) Leucine-rich nuclear-export signals: born to be weak. *Trends*  
1079 *Cell Biol* 15: 121-4
- 1080 Lin TC, Neuner A, Schiebel E (2015) Targeting of gamma-tubulin complexes to microtubule  
1081 organizing centers: conservation and divergence. *Trends Cell Biol* 25: 296-307
- 1082 Ling YC, Vjestica A, Oliferenko S (2009) Nucleocytoplasmic shuttling of the TACC protein  
1083 Mia1p/Alp7p is required for remodeling of microtubule arrays during the cell cycle. *PLoS*  
1084 *One* 4: e6255
- 1085 Liu T, Tian J, Wang G, Yu Y, Wang C, Ma Y, Zhang X, Xia G, Liu B, Kong Z (2014) Augmin  
1086 triggers microtubule-dependent microtubule nucleation in interphase plant cells. *Curr Biol*  
1087 24: 2708-13
- 1088 Lo Presti L, Chang F, Martin SG (2012) Myosin Vs organize actin cables in fission yeast. *Mol*  
1089 *Biol Cell* 23: 4579-91

- 1090 Lynch EM, Grocock LM, Borek WE, Sawin KE (2014) Activation of the gamma-tubulin  
1091 complex by the Mto1/2 complex. *Curr Biol* 24: 896-903
- 1092 Masoud K, Herzog E, Chaboute ME, Schmit AC (2013) Microtubule nucleation and  
1093 establishment of the mitotic spindle in vascular plant cells. *Plant J* 75: 245-57
- 1094 Matsumoto T, Beach D (1991) Premature initiation of mitosis in yeast lacking RCC1 or an  
1095 interacting GTPase. *Cell* 66: 347-60
- 1096 Matsuyama A, Arai R, Yashiroda Y, Shirai A, Kamata A, Sekido S, Kobayashi Y, Hashimoto  
1097 A, Hamamoto M, Hiraoka Y, Horinouchi S, Yoshida M (2006) ORFeome cloning and  
1098 global analysis of protein localization in the fission yeast *Schizosaccharomyces pombe*.  
1099 *Nat Biotechnol* 24: 841-7
- 1100 Mogessie B, Roth D, Rahil Z, Straube A (2015) A novel isoform of MAP4 organises the  
1101 paraxial microtubule array required for muscle cell differentiation. *Elife* 4: e05697
- 1102 Monecke T, Dickmanns A, Ficner R (2014) Allosteric control of the exportin CRM1 unraveled  
1103 by crystal structure analysis. *FEBS J* 281: 4179-94
- 1104 Monecke T, Guttler T, Neumann P, Dickmanns A, Gorlich D, Ficner R (2009) Crystal  
1105 structure of the nuclear export receptor CRM1 in complex with Snurportin1 and RanGTP.  
1106 *Science* 324: 1087-91
- 1107 Monecke T, Haselbach D, Voss B, Russek A, Neumann P, Thomson E, Hurt E, Zachariae U,  
1108 Stark H, Grubmuller H, Dickmanns A, Ficner R (2013) Structural basis for cooperativity of  
1109 CRM1 export complex formation. *Proc Natl Acad Sci U S A* 110: 960-5
- 1110 Nakamura M, Yagi N, Kato T, Fujita S, Kawashima N, Ehrhardt DW, Hashimoto T (2012)  
1111 Arabidopsis GCP3-interacting protein 1/MOZART 1 is an integral component of the  
1112 gamma-tubulin-containing microtubule nucleating complex. *Plant J* 71: 216-25
- 1113 Napetschnig J, Blobel G, Hoelz A (2007) Crystal structure of the N-terminal domain of the  
1114 human protooncogene Nup214/CAN. *Proc Natl Acad Sci U S A* 104: 1783-8
- 1115 Oda Y (2015) Cortical microtubule rearrangements and cell wall patterning. *Front Plant Sci*  
1116 6: 236
- 1117 Ohkura H, Hagan IM, Glover DM (1995) The conserved *Schizosaccharomyces pombe*  
1118 kinase plo1, required to form a bipolar spindle, the actin ring, and septum, can drive  
1119 septum formation in G1 and G2 cells. *Genes Dev* 9: 1059-73
- 1120 Okada N, Sato M (2015) Spatiotemporal Regulation of Nuclear Transport Machinery and  
1121 Microtubule Organization. *Cells* 4: 406-26
- 1122 Okada N, Toda T, Yamamoto M, Sato M (2014) CDK-dependent phosphorylation of Alp7-  
1123 Alp14 (TACC-TOG) promotes its nuclear accumulation and spindle microtubule  
1124 assembly. *Mol Biol Cell* 25: 1969-82
- 1125 Olsen JV, Macek B, Lange O, Makarov A, Horning S, Mann M (2007) Higher-energy C-trap  
1126 dissociation for peptide modification analysis. *Nat Methods* 4: 709-12
- 1127 Ong SE, Blagoev B, Kratchmarova I, Kristensen DB, Steen H, Pandey A, Mann M (2002)  
1128 Stable isotope labeling by amino acids in cell culture, SILAC, as a simple and accurate  
1129 approach to expression proteomics. *Mol Cell Proteomics* 1: 376-86
- 1130 Ossareh-Nazari B, Bachelier F, Dargemont C (1997) Evidence for a role of CRM1 in signal-  
1131 mediated nuclear protein export. *Science* 278: 141-4
- 1132 Petersen J, Russell P (2016) Growth and the Environment of *Schizosaccharomyces pombe*.  
1133 *Cold Spring Harb Protoc* 2016: pdb top079764
- 1134 Petry S, Vale RD (2015) Microtubule nucleation at the centrosome and beyond. *Nat Cell Biol*  
1135 17: 1089-93
- 1136 Port SA, Monecke T, Dickmanns A, Spillner C, Hofele R, Urlaub H, Ficner R, Kehlenbach  
1137 RH (2015) Structural and Functional Characterization of CRM1-Nup214 Interactions  
1138 Reveals Multiple FG-Binding Sites Involved in Nuclear Export. *Cell Rep* 13: 690-702
- 1139 Rappsilber J, Ishihama Y, Mann M (2003) Stop and go extraction tips for matrix-assisted  
1140 laser desorption/ionization, nanoelectrospray, and LC/MS sample pretreatment in  
1141 proteomics. *Anal Chem* 75: 663-70
- 1142 Ren M, Coutavas E, D'Eustachio P, Rush MG (1994) Effects of mutant Ran/TC4 proteins on  
1143 cell cycle progression. *Mol Cell Biol* 14: 4216-24

- 1144 Rivero S, Cardenas J, Bornens M, Rios RM (2009) Microtubule nucleation at the cis-side of  
1145 the Golgi apparatus requires AKAP450 and GM130. *Embo J* 28: 1016-28
- 1146 Roloff S, Spillner C, Kehlenbach RH (2013) Several phenylalanine-glycine motives in the  
1147 nucleoporin Nup214 are essential for binding of the nuclear export receptor CRM1. *J Biol*  
1148 *Chem* 288: 3952-63
- 1149 Saito N, Matsuura Y (2013) A 2.1-A-resolution crystal structure of unliganded CRM1 reveals  
1150 the mechanism of autoinhibition. *J Mol Biol* 425: 350-64
- 1151 Samejima I, Lourenco PC, Snaith HA, Sawin KE (2005) Fission yeast mto2p regulates  
1152 microtubule nucleation by the centrosomin-related protein mto1p. *Mol Biol Cell* 16: 3040-  
1153 51
- 1154 Samejima I, Miller VJ, Groocock LM, Sawin KE (2008) Two distinct regions of Mto1 are  
1155 required for normal microtubule nucleation and efficient association with the gamma-  
1156 tubulin complex in vivo. *J Cell Sci* 121: 3971-80
- 1157 Samejima I, Miller VJ, Rincon SA, Sawin KE (2010) Fission yeast Mto1 regulates diversity of  
1158 cytoplasmic microtubule organizing centers. *Curr Biol* 20: 1959-65
- 1159 Sanchez AD, Feldman JL (2017) Microtubule-organizing centers: from the centrosome to  
1160 non-centrosomal sites. *Curr Opin Cell Biol* 44: 93-101
- 1161 Sanchez-Huertas C, Freixo F, Viais R, Lacasa C, Soriano E, Luders J (2016) Non-  
1162 centrosomal nucleation mediated by augmin organizes microtubules in post-mitotic  
1163 neurons and controls axonal microtubule polarity. *Nat Commun* 7: 12187
- 1164 Sato M, Okada N, Kakui Y, Yamamoto M, Yoshida M, Toda T (2009) Nucleocytoplasmic  
1165 transport of Alp7/TACC organizes spatiotemporal microtubule formation in fission yeast.  
1166 *EMBO Rep* 10: 1161-7
- 1167 Sato M, Vardy L, Angel Garcia M, Koonrugsa N, Toda T (2004) Interdependency of fission  
1168 yeast Alp14/TOG and coiled coil protein Alp7 in microtubule localization and bipolar  
1169 spindle formation. *Mol Biol Cell* 15: 1609-22
- 1170 Sawin KE, Lourenco PC, Snaith HA (2004) Microtubule nucleation at non-spindle pole body  
1171 microtubule-organizing centers requires fission yeast centrosomin-related protein  
1172 mod20p. *Curr Biol* 14: 763-75
- 1173 Sawin KE, Nurse P (1998) Regulation of cell polarity by microtubules in fission yeast. *J Cell*  
1174 *Biol* 142: 457-71
- 1175 Sawin KE, Tran PT (2006) Cytoplasmic microtubule organization in fission yeast. *Yeast* 23:  
1176 1001-1014
- 1177 Schmitt C, von Kobbe C, Bachi A, Pante N, Rodrigues JP, Boscheron C, Rigaut G, Wilm M,  
1178 Seraphin B, Carmo-Fonseca M, Izaurralde E (1999) Dbp5, a DEAD-box protein required  
1179 for mRNA export, is recruited to the cytoplasmic fibrils of nuclear pore complex via a  
1180 conserved interaction with CAN/Nup159p. *Embo J* 18: 4332-47
- 1181 Seltzer V, Janski N, Canaday J, Herzog E, Erhardt M, Evrard JL, Schmit AC (2007)  
1182 *Arabidopsis* GCP2 and GCP3 are part of a soluble gamma-tubulin complex and have  
1183 nuclear envelope targeting domains. *Plant J* 52: 322-31
- 1184 Shevchenko A, Wilm M, Vorm O, Mann M (1996) Mass spectrometric sequencing of proteins  
1185 silver-stained polyacrylamide gels. *Anal Chem* 68: 850-8
- 1186 Srsen V, Fant X, Heald R, Rabouille C, Merdes A (2009) Centrosome proteins form an  
1187 insoluble perinuclear matrix during muscle cell differentiation. *BMC Cell Biol* 10: 28
- 1188 Stade K, Ford CS, Guthrie C, Weis K (1997) Exportin 1 (Crm1p) is an essential nuclear  
1189 export factor. *Cell* 90: 1041-50
- 1190 Stoppin V, Vantard M, Schmit AC, Lambert AM (1994) Isolated Plant Nuclei Nucleate  
1191 Microtubule Assembly: The Nuclear Surface in Higher Plants Has Centrosome-like  
1192 Activity. *Plant Cell* 6: 1099-1106
- 1193 Strawn LA, Shen T, Shulga N, Goldfarb DS, Wentz SR (2004) Minimal nuclear pore  
1194 complexes define FG repeat domains essential for transport. *Nat Cell Biol* 6: 197-206
- 1195 Tagwerker C, Flick K, Cui M, Guerrero C, Dou Y, Auer B, Baldi P, Huang L, Kaiser P (2006)  
1196 A tandem affinity tag for two-step purification under fully denaturing conditions:  
1197 application in ubiquitin profiling and protein complex identification combined with in  
1198 vivocross-linking. *Mol Cell Proteomics* 5: 737-48

- 1199 Tange Y, Chikashige Y, Takahata S, Kawakami K, Higashi M, Mori C, Kojidani T, Hirano Y,  
1200 Asakawa H, Murakami Y, Haraguchi T, Hiraoka Y (2016) Inner nuclear membrane protein  
1201 Lem2 augments heterochromatin formation in response to nutritional conditions. *Genes*  
1202 *Cells* 21: 812-32
- 1203 Tassin AM, Maro B, Bornens M (1985) Fate of microtubule-organizing centers during  
1204 myogenesis in vitro. *J Cell Biol* 100: 35-46
- 1205 Tran PT, Marsh L, Doye V, Inoue S, Chang F (2001) A mechanism for nuclear positioning in  
1206 fission yeast based on microtubule pushing. *J Cell Biol* 153: 397-411
- 1207 Tyanova S, Temu T, Cox J (2016) The MaxQuant computational platform for mass  
1208 spectrometry-based shotgun proteomics. *Nat Protoc* 11: 2301-2319
- 1209 Venkatram S, Jennings JL, Link A, Gould KL (2005) Mto2p, a novel fission yeast protein  
1210 required for cytoplasmic microtubule organization and anchoring of the cytokinetic actin  
1211 ring. *Mol Biol Cell* 16: 3052-63
- 1212 Venkatram S, Tasto JJ, Feoktistova A, Jennings JL, Link AJ, Gould KL (2004) Identification  
1213 and characterization of two novel proteins affecting fission yeast gamma-tubulin complex  
1214 function. *Mol Biol Cell* 15: 2287-301
- 1215 Weirich CS, Erzberger JP, Berger JM, Weis K (2004) The N-terminal domain of Nup159  
1216 forms a beta-propeller that functions in mRNA export by tethering the helicase Dbp5 to  
1217 the nuclear pore. *Mol Cell* 16: 749-60
- 1218 Wentz SR, Rout MP (2010) The nuclear pore complex and nuclear transport. *Cold Spring*  
1219 *Harb Perspect Biol* 2: a000562
- 1220 Wu J, Akhmanova A (2017) Microtubule-Organizing Centers. *Annu Rev Cell Dev Biol*
- 1221 Wu J, de Heus C, Liu Q, Bouchet BP, Noordstra I, Jiang K, Hua S, Martin M, Yang C,  
1222 Grigoriev I, Katrukha EA, Altelaar AF, Hoogenraad CC, Qi RZ, Klumperman J,  
1223 Akhmanova A (2016) Molecular Pathway of Microtubule Organization at the Golgi  
1224 Apparatus. *Dev Cell* 39: 44-60
- 1225 Xu D, Marquis K, Pei J, Fu SC, Cagatay T, Grishin NV, Chook YM (2015) LocNES: a  
1226 computational tool for locating classical NESs in CRM1 cargo proteins. *Bioinformatics* 31:  
1227 1357-65
- 1228 Zebrowski DC, Vergarajauregui S, Wu CC, Piatkowski T, Becker R, Leone M, Hirth S,  
1229 Ricciardi F, Falk N, Giessl A, Just S, Braun T, Weidinger G, Engel FB (2015)  
1230 Developmental alterations in centrosome integrity contribute to the post-mitotic state of  
1231 mammalian cardiomyocytes. *Elife* 4
- 1232 Zeitler B, Weis K (2004) The FG-repeat asymmetry of the nuclear pore complex is  
1233 dispensable for bulk nucleocytoplasmic transport in vivo. *J Cell Biol* 167: 583-90
- 1234 Zhang J, Megraw TL (2007) Proper recruitment of gamma-tubulin and D-TACC/Msps to  
1235 embryonic *Drosophila* centrosomes requires Centrosomin Motif 1. *Mol Biol Cell* 18: 4037-  
1236 49
- 1237 Zheng L, Schwartz C, Wee L, Oliferenko S (2006) The fission yeast transforming acidic  
1238 coiled coil-related protein Mia1p/Alp7p is required for formation and maintenance of  
1239 persistent microtubule-organizing centers at the nuclear envelope. *Mol Biol Cell* 17: 2212-  
1240 22
- 1241
- 1242

1243 **Supplementary Figures**

1244

1245 **Fig. 1 Supplement 1.** Additional data relating to Mto1[NE] and Mto1[bonsai], and Mto1[NE]  
1246 localization in *alp7Δ*.

1247

1248 **Fig. 3 Supplement 1.** Additional data relating to leptomycin B sensitivity.

1249

1250 **Fig. 4 Supplement 1.** Summary of replicate mass spectrometry results comparing GFP-  
1251 Mto1[9A1-NE]-HTB and GFP-Mto1[ΔNES-9A1-NE]-HTB interactomes.

1252

1253 **Fig.5 Supplement 1.** Effects of mutant Ran (*spi1* in fission yeast) on cell viability, Mto1[NE]  
1254 localization, and import of a nuclear localization signal (NLS) reporter

1255

1256 **Fig. 6 Supplement 1.** Additional characterization of Nup146[ΔFG5-12].

1257

1258 **Fig. 7 Supplement 1.** Models for stable docking of a high-affinity NES cargo at the  
1259 cytoplasmic face of the nuclear pore complex via Nup146 and for formation of export-like  
1260 complexes from cytoplasmic cargo.

1261

1262

1263 **Supplementary Files**

1264

1265 **Supplementary File 1.** Yeast strains used in this work.

1266

1267 **Supplementary File 2.** Mass spectrometry data and summary from preliminary SILAC  
1268 experiment.

1269

1270 **Supplementary File 3.** Combined mass spectrometry data and LFQ summaries for  
1271 experiments shown in Fig. 1.

1272

1273 **Supplementary File 4.** Combined mass spectrometry data and LFQ summaries for  
1274 experiments shown in Fig. 3.

1275

1276 **Supplementary File 5.** Combined mass spectrometry data and LFQ summaries for  
1277 experiments shown in Fig. 4.

1278

1279 **Supplementary File 6.** Combined mass spectrometry data and LFQ summaries for  
1280 experiments shown in Fig. 6.

1281

1282

1283



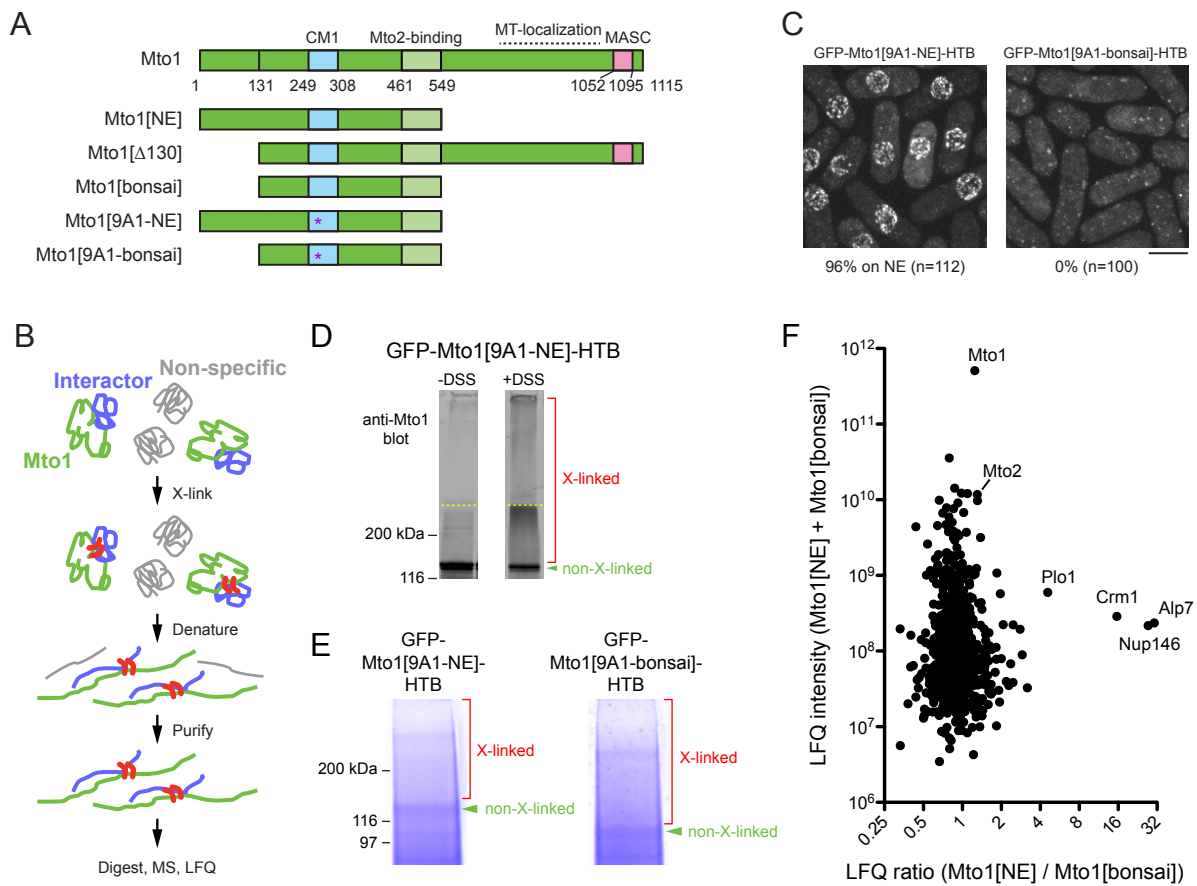

**Figure 1. Identification of proteins interacting with Mto1[NE] but not Mto[bonsai].**

(A) Diagram of full-length Mto1 and Mto1-truncation mutants. Asterisk indicates 9A1 mutation, which abolishes interaction with  $\gamma$ -tubulin complex (Samejima *et al.*, 2008, PMID 19001497). (B) Outline of cross-linking and mass spectrometry approach to identify Mto1 interactors. (C) Localization of GFP-Mto1[9A1-NE]-HTB and GFP-Mto1[9A1-bonsai]-HTB. Numbers below images indicate percent cells with GFP signal on the nuclear envelope (n= total number of cells scored). (D) Anti-Mto1 Western blot of whole-cell lysates from *GFP-mto1[9A1-NE]-HTB* cells in the absence of cross-linking (-DSS) and after disuccinimidyl suberate cross-linking (+DSS). Dashed line indicates boundary between resolving gel and stacking gel. (E) SDS-PAGE of GFP-Mto1[9A1-NE]-HTB sample and GFP-Mto1[9A1-bonsai]-HTB sample after DSS cross-linking and two-step denaturing purification. Regions marked “X-linked” were analyzed by mass spectrometry (see Materials and Methods). (F) Mass spectrometry label-free quantification (LFQ) of 750 proteins from samples as in E. “LFQ ratio” indicates relative enrichment of a given protein in the purified GFP-Mto1[9A1-NE]-HTB sample compared to the purified GFP-Mto1[9A1-bonsai]-HTB sample. “LFQ intensity” indicates total intensity (arbitrary units) of a given protein from the combined purified samples. Data shown represent one of two independent biological replicates. Complete datasets are in Supplementary File 3. Bar, 5  $\mu$ m. See also Figure 1 Supplement 1.

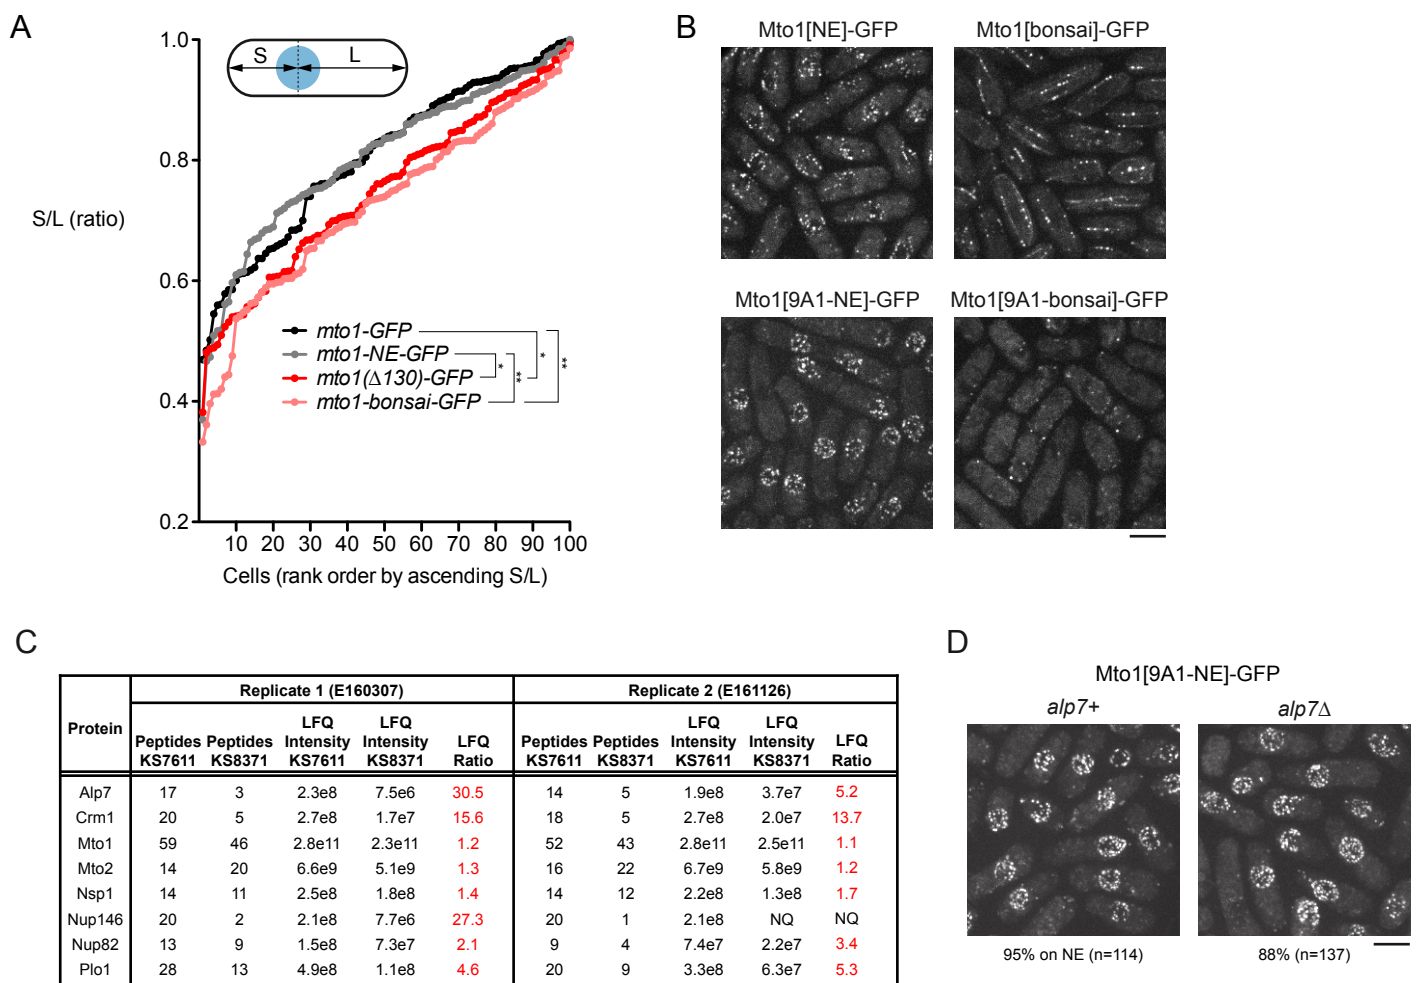

**Figure 1 Supplement 1. Additional data relating to Mto1[NE] and Mto1[bonsai], and Mto1[NE] localization in *alp7Δ*.** **(A)** Nuclear positioning in strains of the indicated genotypes (see Fig. 1A). 100 cells of each genotype were scored. For each cell, distance from nucleus to each cell end was measured. The shorter of the two distances was termed S, and the longer was termed L. Y-axis shows ratio S/L for cells of each genotype, in rank order. Higher S/L ratios indicate more accurate nuclear centering. \*  $p < 0.01$ ; \*\*  $p < 0.001$ ; other differences were not significant. **(B)** Enhancement of localization of Mto1[NE]-GFP to the nuclear envelope (NE) as a result of the *9A1* mutation (previously described by Lynch *et al.*, 2014, PMID 24704079). Both Mto1[NE]-GFP and Mto1[bonsai]-GFP promote microtubule (MT) nucleation by the  $\gamma$ -tubulin complex, and thus both are present at minus ends of individual MTs within MT bundles, even though neither binds directly to the MT lattice. When the *9A1* mutation is introduced, absence of MT nucleation abrogates association with MT minus ends, leading to increased Mto1[9A1-NE]-GFP on the NE. **(C)** Peptide counts and label-free quantification (LFQ) values for selected proteins shown in Fig. 1F. Data from two independent biological replicates are shown, with strain numbers and experiment numbers. Nsp1 and Nup82 are included as likely representative Nup146 interactors, based on homology to budding yeast (Belgareh *et al.*, 1998, PMID 9843582). NQ = not quantified, because peptide count in the relevant sample was below threshold for quantification. See also Supplementary File 3. **(D)** Localization of Mto1[9A1-NE]-GFP to the NE in both wild-type (*alp7+*) and *alp7Δ* cells. Numbers below images indicate percent cells with Mto1[9A1-NE]-GFP on the NE ( $n$  = total number of cells scored). Bars, 5  $\mu$ m.

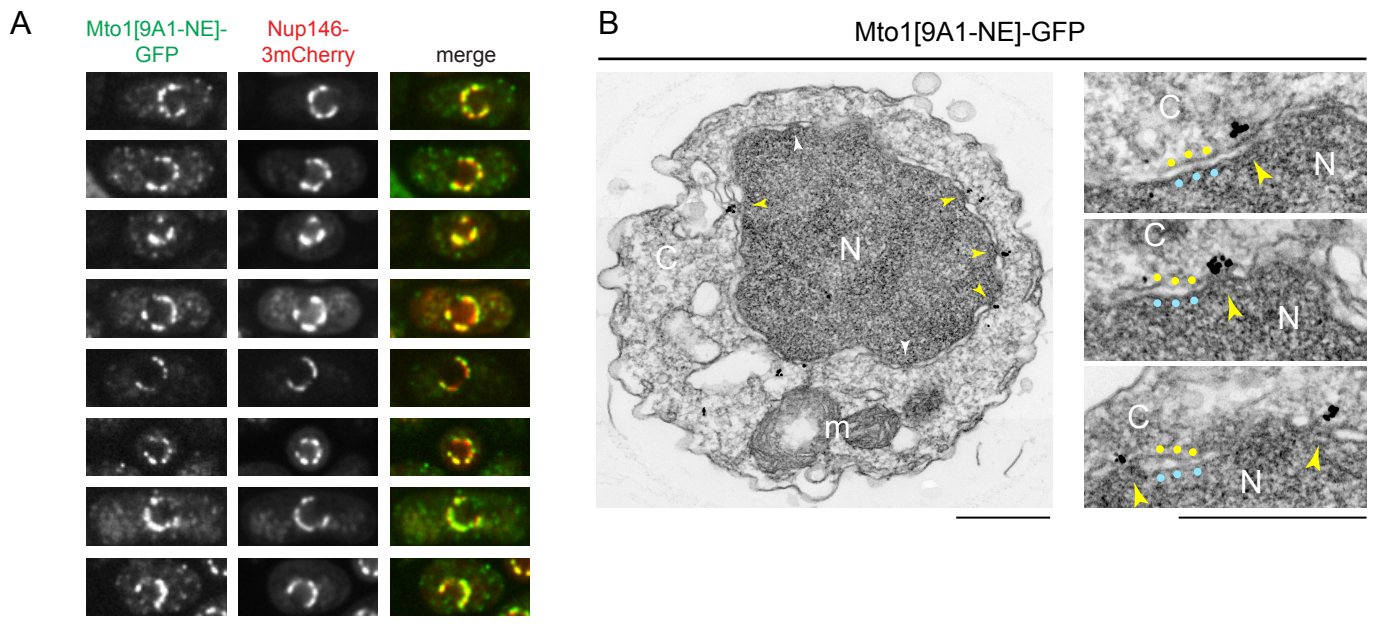

**Figure 2. Mto1[NE] is localized to the cytoplasmic face of the nuclear pore complex.**

**(A)** Colocalization of Mto1[9A1-NE]-GFP and Nup146-3mCherry after nuclear pore complex (NPC) clustering in *nup132Δ* cells. For each cell, a single central Z-section is shown. **(B)** Immunoelectron microscopy of Mto1[9A1-NE]-GFP. Left panel shows cross-section of a single cell. NPCs can be seen as slightly electron-dense regions where inner and outer nuclear membranes meet. Yellow arrowheads indicate NPCs with Mto1[9A1-NE]-GFP on cytoplasmic face of NPC. White arrowheads indicate examples of unstained NPCs. Right panels show magnified examples from other cells. Yellow and blue dots indicate inner and outer nuclear membranes, respectively. N, nucleus; C, cytoplasm; m, mitochondria. Bars, 5  $\mu$ m (A), 0.5  $\mu$ m (B).



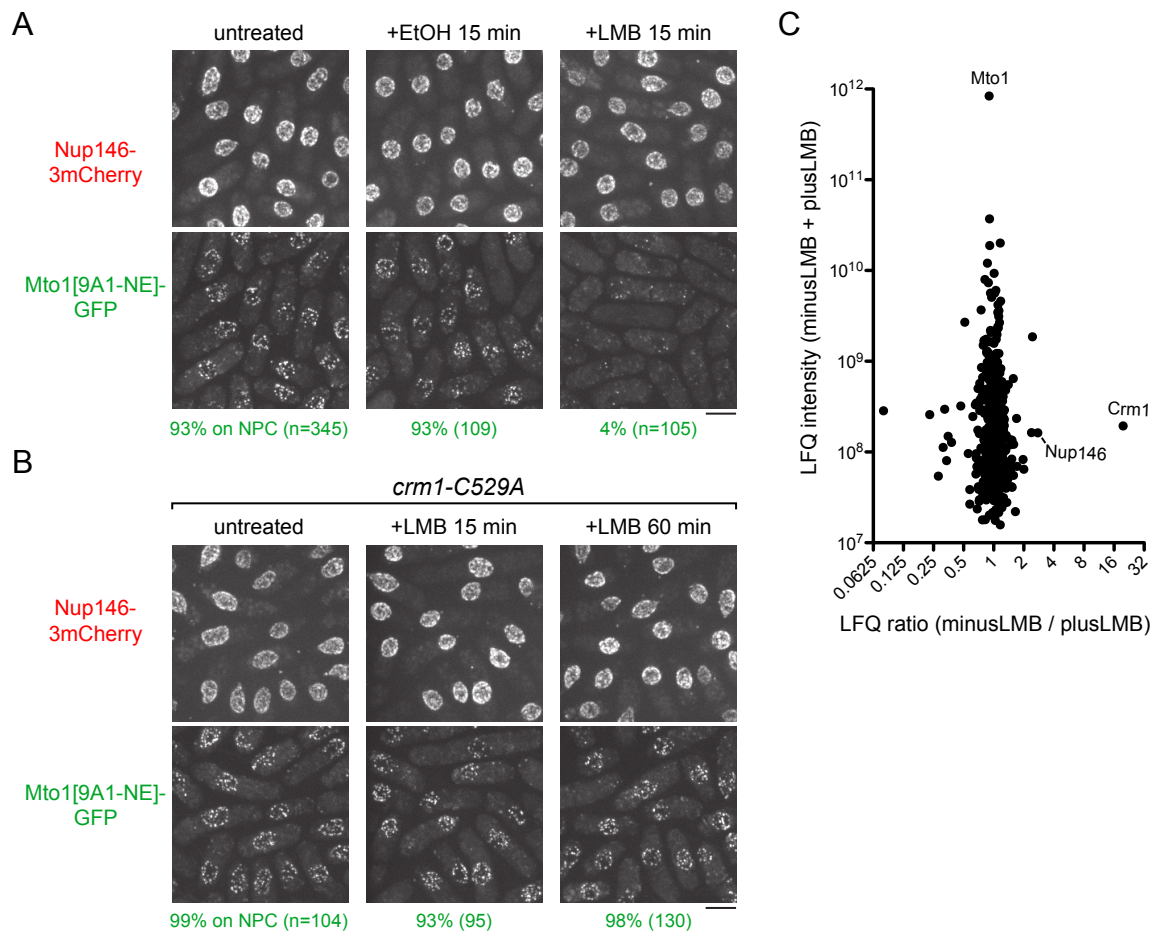

**Figure 3. Inhibition of Crm1 cargo-binding by Leptomycin B treatment disrupts Mto1[NE] localization to nuclear pore complexes and Mto1[NE] interaction with Crm1.**

**(A)** Localization of Nup146-3mCherry and Mto1[9A1-NE]-GFP in untreated cells and in cells treated with 1% ethanol (+EtOH) or with 100 nM leptomycin B (+LMB) in ethanol for 15 min. Numbers below images indicate percent cells with Mto1 on NPCs (n=total number of cells scored). **(B)** Localization of Nup146-3mCherry and Mto1[9A1-NE]-GFP in *crm1-C529A* cells, which are resistant to LMB. Cells were untreated or treated with 100 nM LMB for 15 or 60 min. **(C)** Mass spectrometry label-free quantification (LFQ) of 483 proteins from samples of cross-linked, purified GFP-Mto1[9A1-NE]-HTB from untreated (“minusLMB”) vs. LMB-treated (“plusLMB”) cells. “LFQ ratio” indicates relative enrichment of a given protein in the purified minusLMB sample compared to the purified plusLMB sample. “LFQ intensity” indicates total intensity (arbitrary units) of a given protein from the combined purified samples. Data shown represent geometric mean from two independent biological replicates. See also Figure 3 Supplement 1. Complete datasets are in Supplementary File 4. Bars, 5  $\mu$ m.

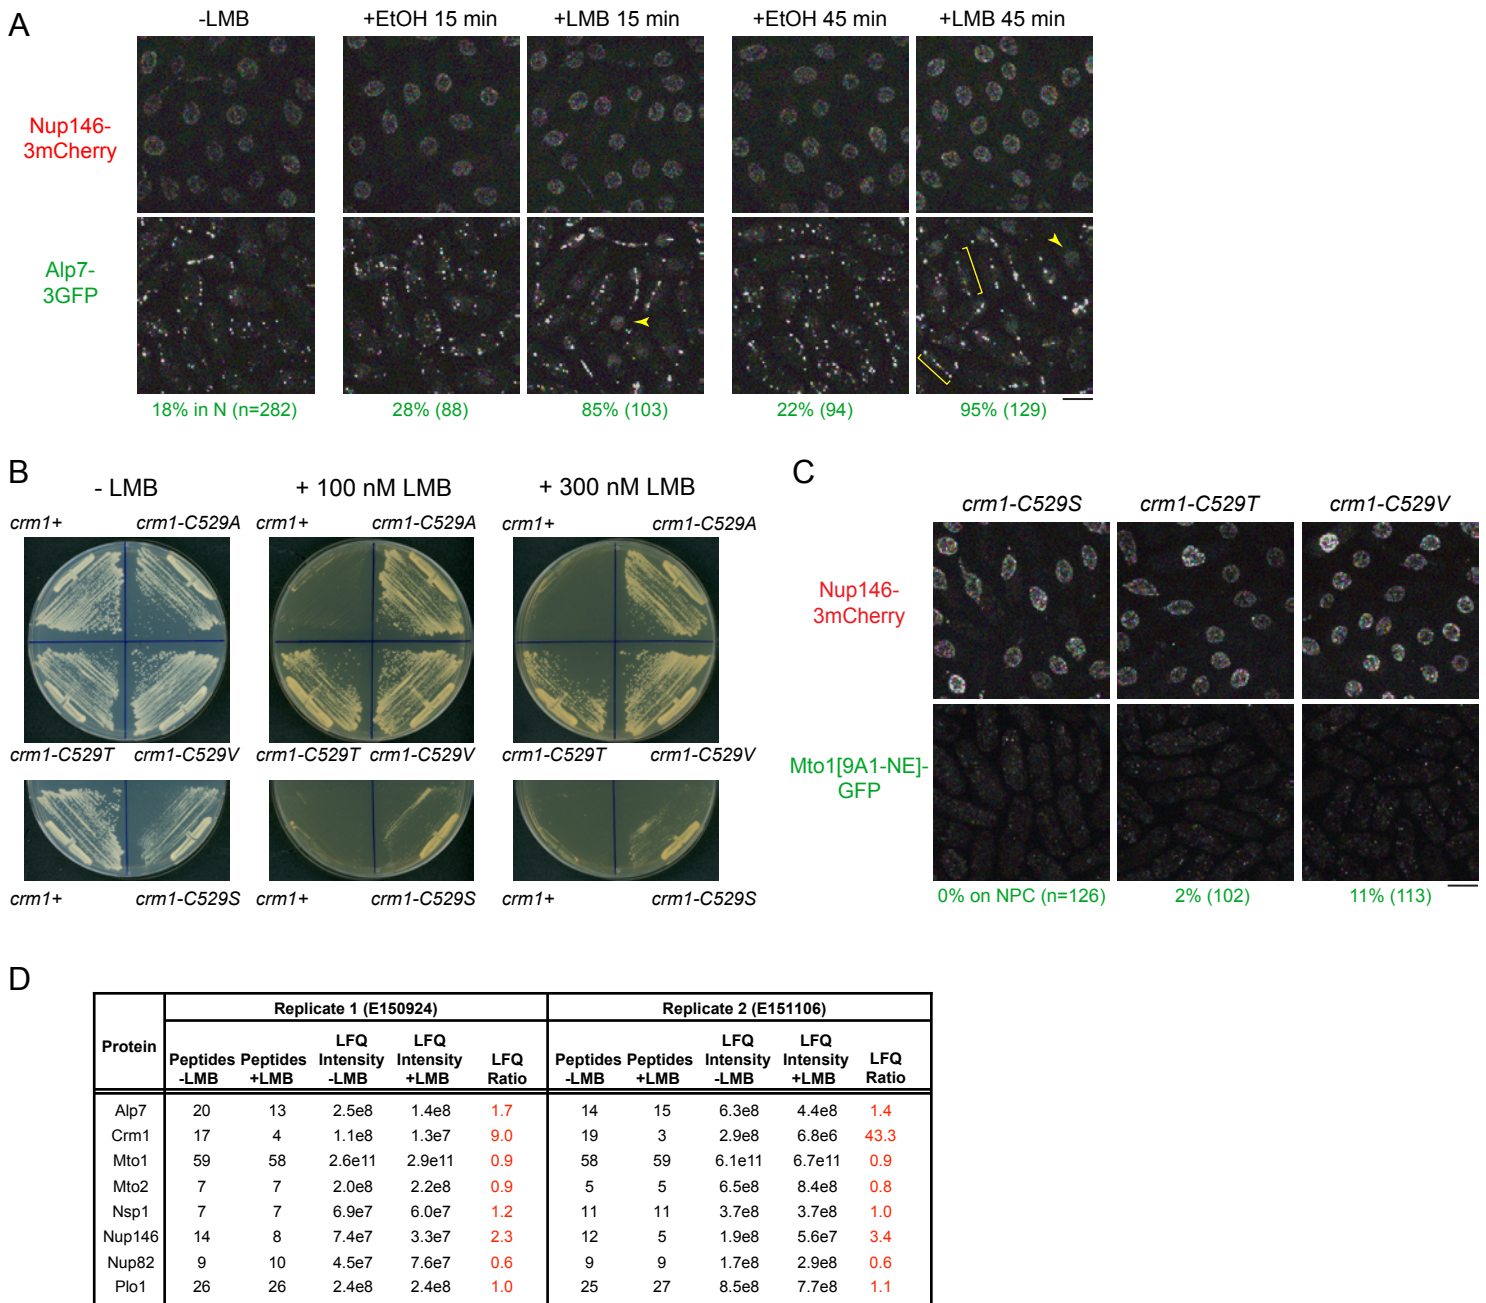

**Figure 3 Supplement 1. Additional data relating to leptomycin B sensitivity.**

**(A)** Localization of Nup146-3mCherry and Alp7-3GFP in untreated cells and in cells treated with 1% ethanol (+EtOH; carrier) or with 100 nM leptomycin B (LMB) in ethanol for 15 and 45 min. Numbers below images indicate percent cells with Alp7 in the nucleus (n=total number of cells scored). Arrowheads indicate examples of Alp7-3GFP accumulation in the nucleus. Brackets indicate examples of Alp7-3GFP puncta on the intranuclear microtubule bundle that forms in interphase cells after LMB treatment (Matsuyama *et al.*, 2006, PMID 16823372). **(B)** Colony formation and growth of wild-type cells (*crm1+*) and *crm1* mutants indicated, on plates without LMB and on plates containing 100 nM or 300 nM LMB. While *crm1-C529A*, *crm1-C529T*, and *crm1-C529V* mutants are essentially completely resistant to LMB, *crm1-C529S* mutant is only partially resistant. **(C)** Mto1[9A1-NE]-GFP and Nup146-3mCherry localization in the *crm1* mutants indicated, in the absence of LMB. Unlike *crm1-C529A* (Fig. 3), in these mutants, Mto1[9A1-NE]-GFP fails to localize to nuclear pore complexes. **(D)** Peptide counts and label-free quantification (LFQ) values for selected proteins from the two replicate experiments contributing to the graph in Fig. 3C. Bars, 5  $\mu$ m. See also Supplementary File 4.

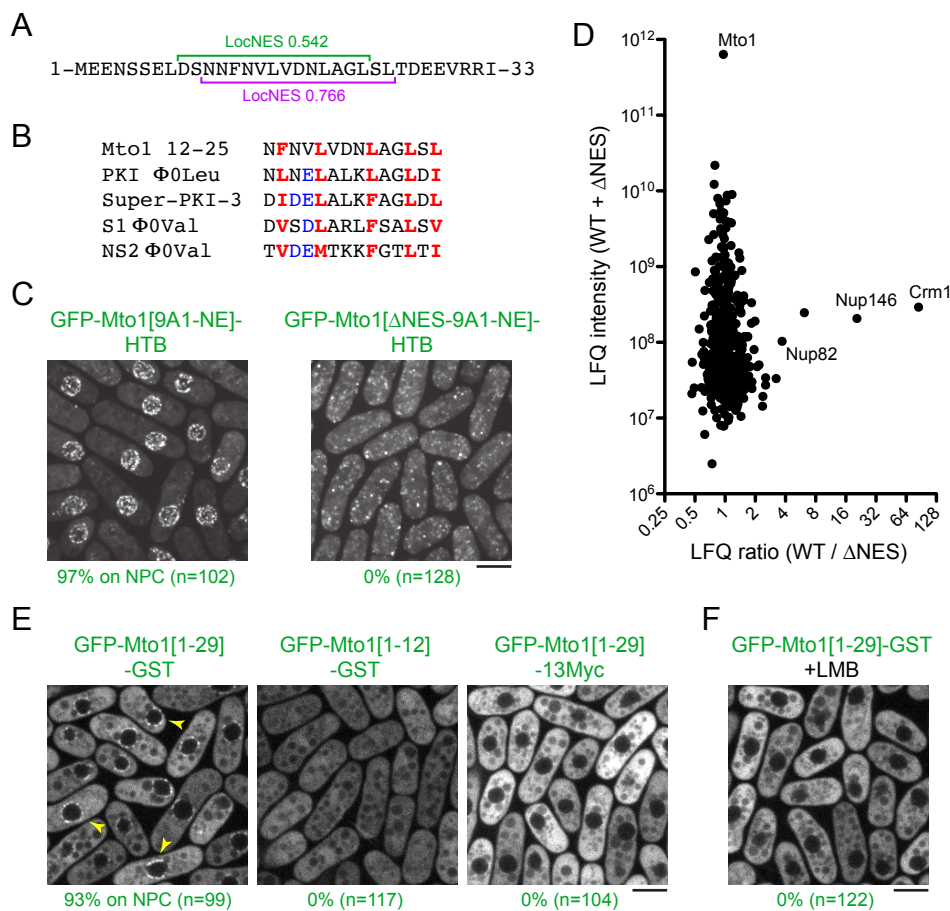

**Figure 4. Mto1 interacts with Crm1 via a NES-like sequence near the Mto1 amino-terminus.**

(A) Predicted NESs in the first 33 amino acids of Mto1, with associated LocNES scores (Xu *et al.*, 2015, PMID 25515756). These are the only sequences in the first 130 amino acids of Mto1 with LocNES scores greater than 0.1 (B) Alignment of Mto1 amino acids 12-25 with four non-natural, high-affinity NESs (“supraphysiological” NESs) described by Güttler *et al.* (Güttler *et al.*, 2010, PMID 20972448; Engelsma *et al.*, 2004, PMID 15329671). Conserved hydrophobic residues are indicated in red. Acidic residues shown to enhance NES affinity for Crm1 are in blue. (C) Localization of GFP-Mto1[9A1-NE]-HTB and GFP-Mto1[ $\Delta$ NES-9A1-NE]-HTB, which lacks Mto1 amino acids 1-25. Numbers below images indicate percent cells with Mto1 at NPCs (n= total number of cells scored). (D) Mass spectrometry label-free quantification (LfQ) of 469 proteins from samples of cross-linked, purified GFP-Mto1[9A1-NE]-HTB (“WT”) and cross-linked, purified GFP-Mto1[ $\Delta$ NES-9A1-NE]-HTB (“ $\Delta$ NES”). “LfQ ratio” indicates relative enrichment of a given protein in the purified WT sample compared to the purified  $\Delta$ NES sample. “LfQ intensity” indicates total intensity (arbitrary units) of a given protein from the combined purified samples. Data shown represent one of two independent biological replicates. Nup82 is labeled because it is likely to interact with Nup146, based on homology with budding yeast (Belgareh *et al.*, 1998, PMID 9843582). See also Figure 4 Supplement 1. Complete datasets are in Supplementary File 5. (E) Localization of the indicated Mto1 fragments fused to GFP at their N-termini and either GST or 13Myc at their C-termini. Arrowheads indicate examples of localization to the NPCs. Numbers below images indicate percent cells with Mto1 at NPCs (n= total number of cells scored). (F) Localization of GFP-Mto1[1-29]-GST in leptomycin B-treated cells. Images in E and F are single Z-sections, while other images are maximum projections. Bars, 5  $\mu$ m.

| Protein | Replicate 1 (E160419) |          |           |           |       | Replicate 2 (E161127) |          |           |           |       |
|---------|-----------------------|----------|-----------|-----------|-------|-----------------------|----------|-----------|-----------|-------|
|         | Peptides              | Peptides | LFQ       | LFQ       | LFQ   | Peptides              | Peptides | LFQ       | LFQ       | LFQ   |
|         | KS7611                | KS8573   | Intensity | Intensity | Ratio | KS7611                | KS8573   | Intensity | Intensity | Ratio |
| Alp7    | 15                    | 14       | 2.2e8     | 1.4e8     | 1.5   | 12                    | 9        | 2.1e8     | 1.4e8     | 1.5   |
| Crm1    | 21                    | 2        | 2.9e8     | 3.4e6     | 85.2  | 20                    | 2        | 3.5e8     | 5.5e6     | 63.4  |
| Mto1    | 47                    | 47       | 3.1e11    | 3.2e11    | 1.0   | 40                    | 40       | 3.1e11    | 3.2e11    | 1.0   |
| Mto2    | 10                    | 10       | 4.8e9     | 4.1e9     | 1.2   | 8                     | 8        | 6.3e9     | 5.9e9     | 1.1   |
| Nsp1    | 10                    | 9        | 2.2e8     | 1.2e8     | 1.8   | 10                    | 9        | 2.4e8     | 1.0e8     | 2.4   |
| Nup146  | 15                    | 3        | 2.0e8     | 9.5e6     | 20.7  | 19                    | 0        | 1.5e8     | NQ        | NQ    |
| Nup82   | 10                    | 7        | 8.1e7     | 2.2e7     | 3.7   | 6                     | 2        | 5.1e7     | NQ        | NQ    |
| Plo1    | 17                    | 15       | 2.5e8     | 1.6e8     | 1.5   | 17                    | 10       | 2.2e8     | 1.8e8     | 1.2   |

**Figure 4 Supplement 1. Summary of replicate mass spectrometry results comparing GFP-Mto1[9A1-NE]-HTB and GFP-Mto1[ΔNES-9A1-NE]-HTB interactomes.**

Peptide counts and label-free quantification (LFQ) values for selected proteins shown in Fig. 4D. Data from two independent biological replicates are shown, with strain numbers and experiment numbers. NQ = not quantified, because peptide count and/or LFQ intensity in the relevant samples was below threshold for quantification. See also Supplementary File 5.



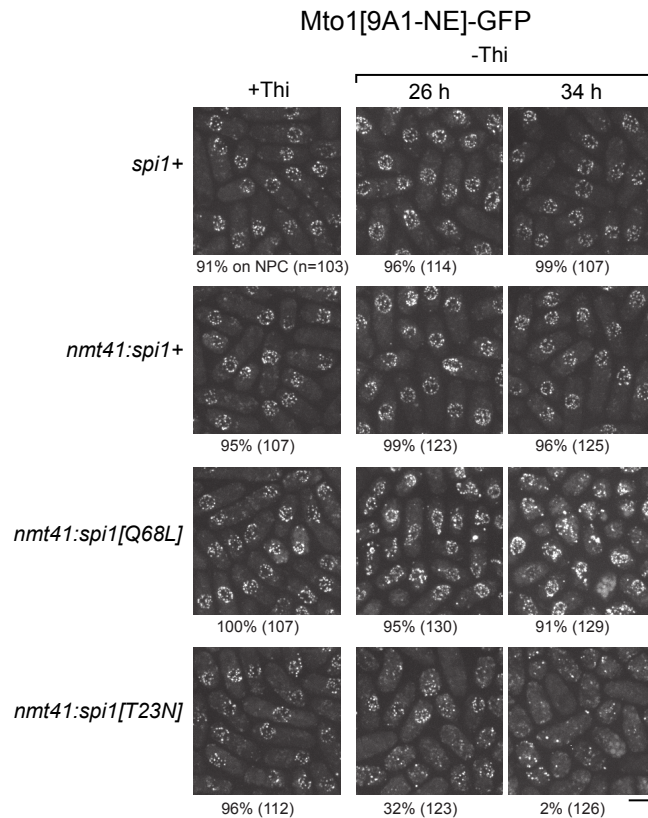

**Figure 5. Expression of dominant-negative Ran (*spi1*[T23N]) but not constitutively active Ran (*spi1*[Q68L]) disrupts localization of Mto1[NE] to nuclear pore complexes.**

Mto1[9A1-NE]-GFP localization in strains containing different versions of Ran (*spi1* in fission yeast) expressed from the thiamine-repressible *nmt41* promoter, together with control wild-type cells (*spi1+*). Cells are shown in the presence of thiamine (+Thi), and 26 and 34 h after removal of thiamine (-Thi). 26 and 34 h represent early and later stages of induced expression, respectively (see Fig. 5 Supplement 1). Numbers below images indicate percent cells with Mto1[9A1-NE]-GFP on nuclear pore complexes (n=total number of cells scored). Bar, 5  $\mu$ m.

A

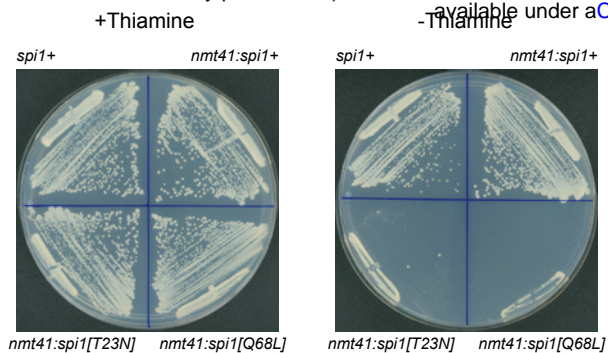

B

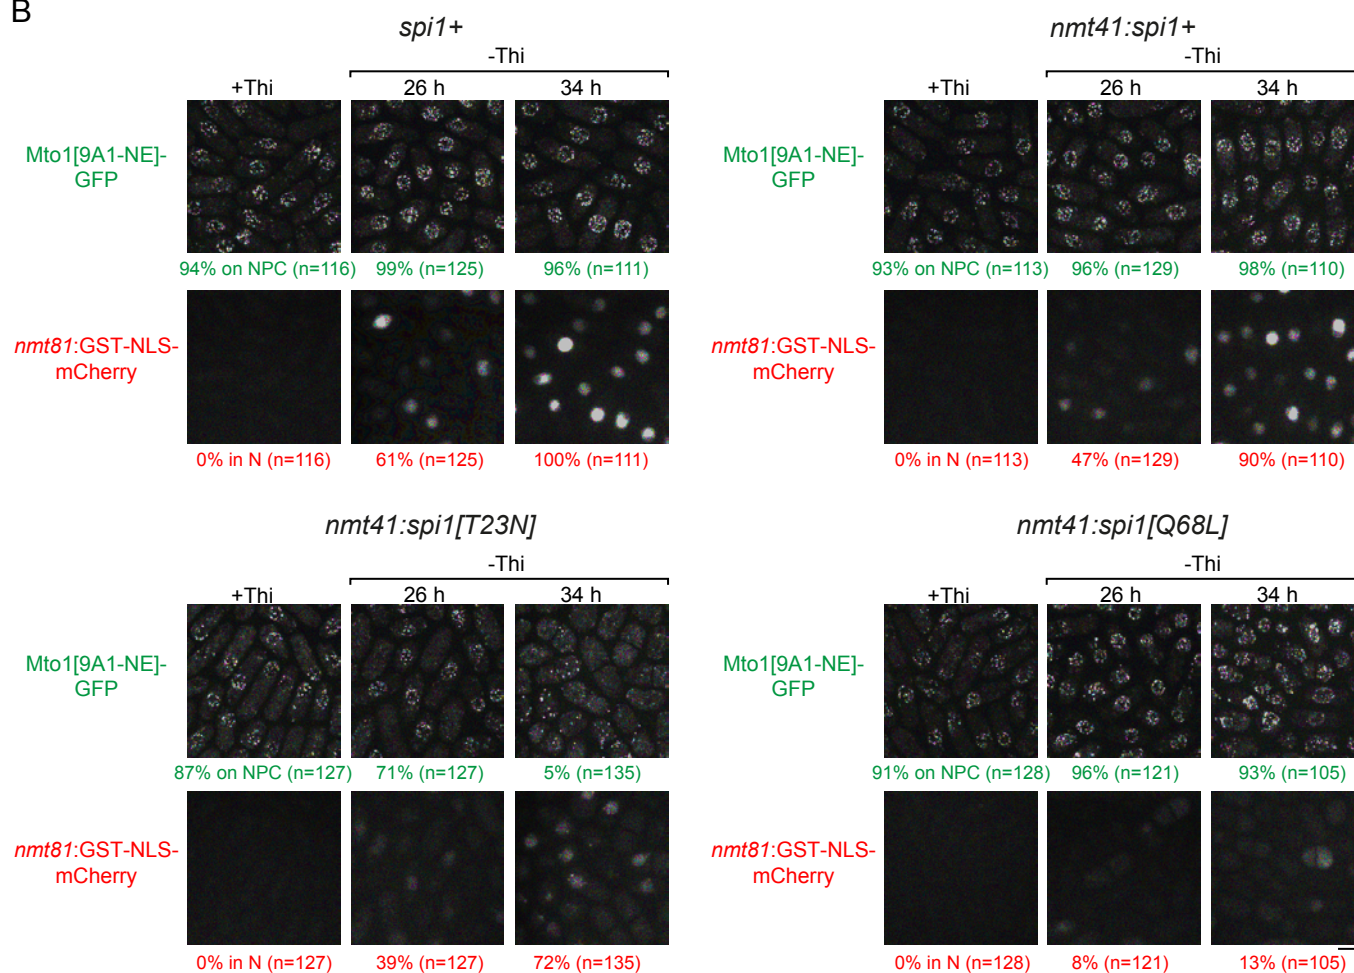

**Figure 5 Supplement 1. Effects of mutant Ran (*spi1* in fission yeast) on cell viability, Mto1[NE] localization, and import of a nuclear localization signal (NLS) reporter.**

(A) Colony formation after 2 d growth in the presence and absence of thiamine, in (clockwise from top left) control cells (*spi1+*) and cells expressing wild-type Ran (*nmt41:spi1+*), constitutively-active Ran (*nmt41:spi1*[Q68L]), or dominant-negative Ran (*nmt41:spi1*[T23N]), under the control of the medium-strength thiamine-repressible *nmt41* promoter. (B) Localization of Mto1[9A1-NE]-GFP, together with nuclear-localization-signal (NLS) reporter GST-NLS-mCherry, in the strains expressing the different versions of Ran. Cells are shown in the presence of thiamine (+Thi), and 26 and 34 h after removal of thiamine to induce expression (-Thi). GST-NLS-mCherry expression is under control of the low-strength thiamine-repressible *nmt81* promoter and thus also regulated by thiamine. Therefore, GST-NLS-mCherry reports both the kinetics of thiamine-regulated expression (e.g. 26 vs. 34 h) and the effects of different Ran mutants on nuclear transport and/or nuclear morphology. Numbers below images indicate percent cells with Mto1[9A1-NE]-GFP on NPCs (green), or percent cells with GST-NLS-mCherry in the nucleus (red; n=total number of cells scored). Images of GST-NLS-mCherry are sum projections, while images of Mto1[9A1-NE]-GFP are maximum projections. Bar, 5  $\mu$ m.



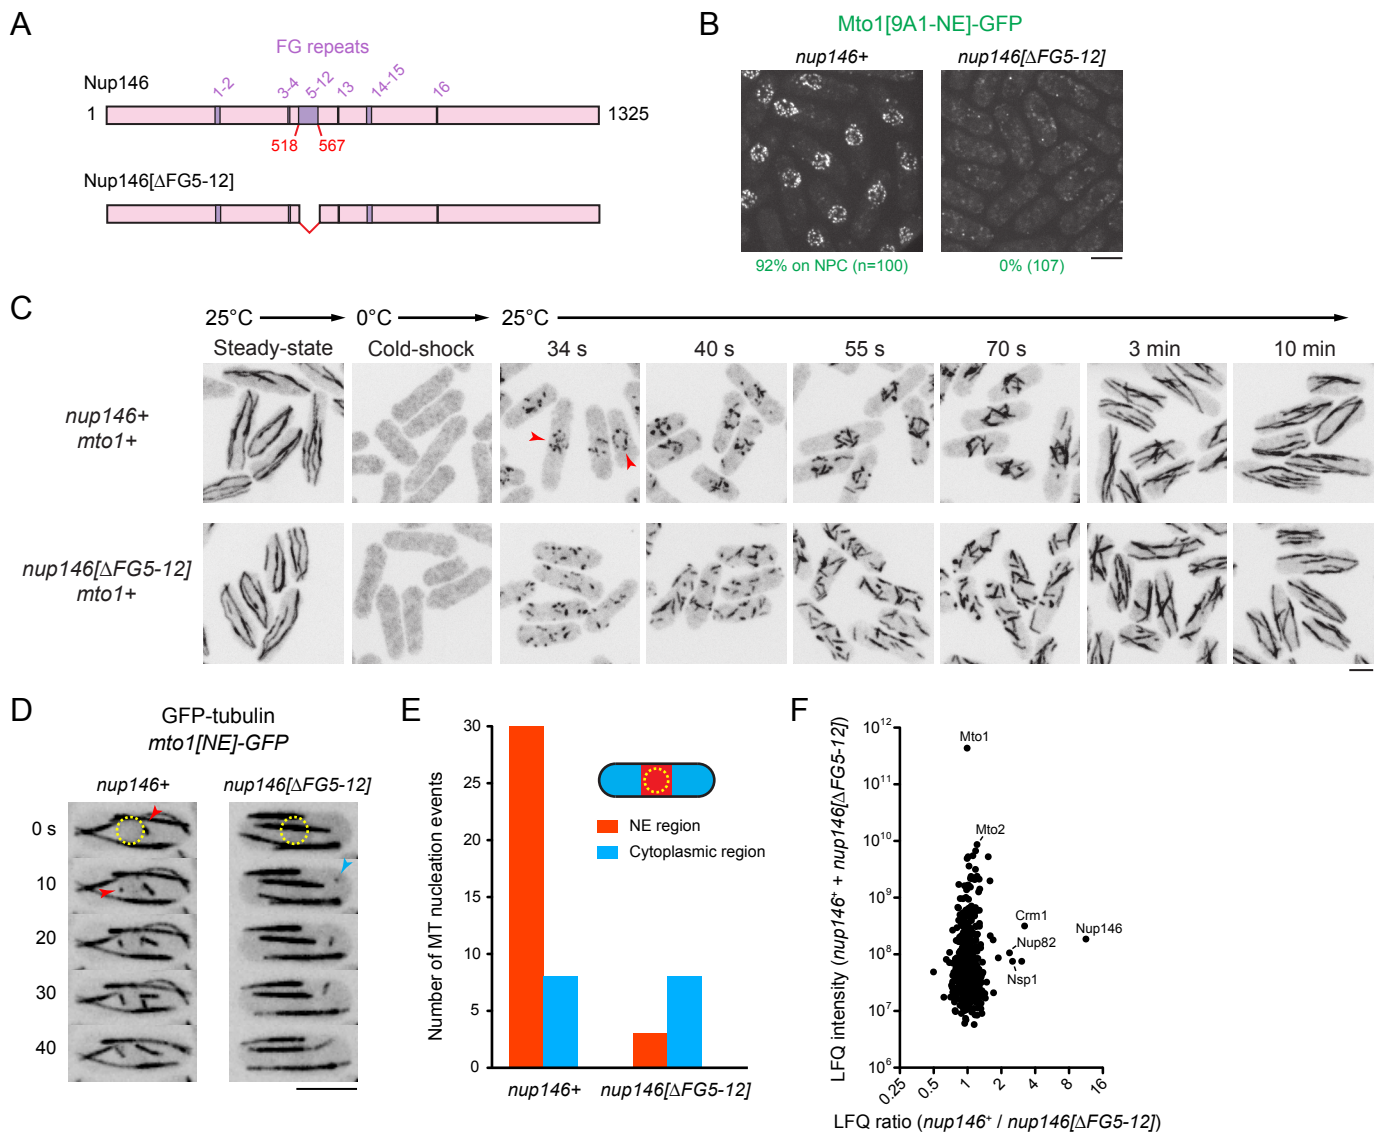

**Figure 6. Nup146 FG repeats are required for Mto1[NE] docking at nuclear pore complexes, microtubule nucleation from the nuclear envelope region, and Mto1 interaction with Nup146.**

**(A)** Diagram of Nup146 and Nup146[ $\Delta$ FG5-12]. **(B)** Localization of Mto1[9A1-NE]-GFP in wild-type (*nup146+*) and *nup146*[ $\Delta$ FG5-12] cells. Numbers below images indicate percent cells with Mto1 on NPCs ( $n$  = total number of cells scored). **(C)** Anti-tubulin immunofluorescence of wild-type (*nup146+*) and *nup146*[ $\Delta$ FG5-12] cells during microtubule (MT) regrowth after cold-induced MT depolymerization. Both strains express full-length, wild-type Mto1. Arrowheads in *nup146+* cells indicate examples of MT regrowth from the nuclear envelope (NE) region, which does not occur in *nup146*[ $\Delta$ FG5-12] cells. **(D)** GFP-tubulin images from time-lapse video showing MT nucleation in wild-type (*nup146+*) and *nup146*[ $\Delta$ FG5-12] cells. Yellow dashed line indicates cell nucleus. Red arrowheads indicate nucleation from the NE region. Blue arrowhead indicates nucleation from non-NE cytoplasmic region. In these cells, Mto1[NE] is also tagged with GFP but is too faint to be seen relative to GFP-tubulin. **(E)** Quantification of MT nucleation from videos of the type shown in D. Numbers represent total number of events for 90 cells of each strain, imaged for 100 s. Differences between strains were highly significant ( $p=0.0026$ ; Fisher's exact test, two-sided). **(F)** Mass spectrometry label-free quantification (LFQ) of 512 proteins from samples of cross-linked, purified GFP-Mto1[9A1-NE]-HTB from wild-type (*nup146+*) and from *nup146*[ $\Delta$ FG5-12] cells. "LFQ ratio" indicates relative enrichment of a given protein in the purified sample from *nup146+* cells compared to the purified sample from *nup146*[ $\Delta$ FG5-12] cells. "LFQ intensity" indicates total intensity (arbitrary units) of a given protein from the combined purified samples. Data shown represent geometric mean from two independent biological replicates. Nup82 and Nsp1 are labeled because they are likely to interact with Nup146, based on homology with budding yeast (Belgareh *et al.*, 1998, PMID 9843582). Complete datasets are in Supplementary File 6. Bars, 5  $\mu$ m. See also Figure 6 Supplement 1.

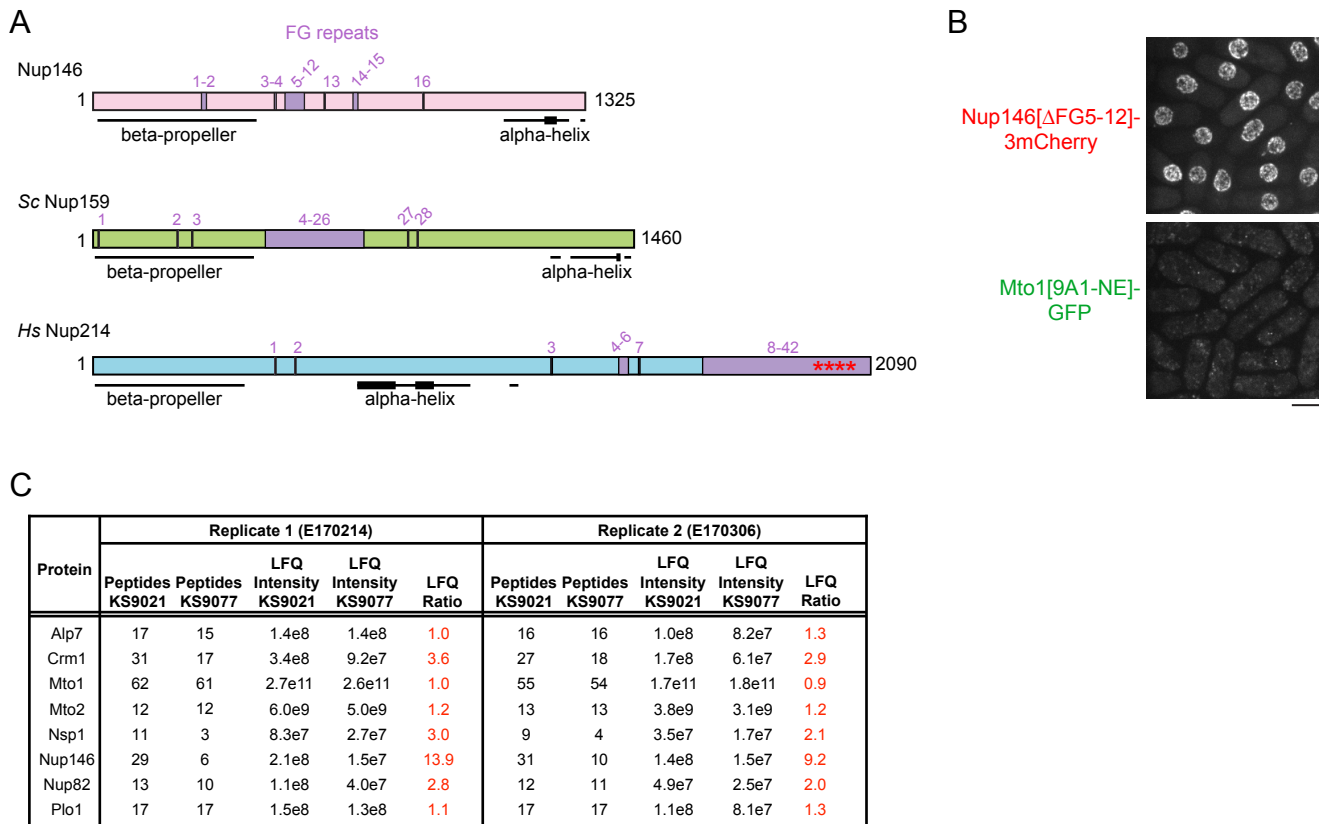

**Figure 6 Supplement 1. Additional characterization of Nup146[ΔFG5-12].**

**(A)** Diagram of *S. pombe* Nup146 (see Fig. 6), together with homologs *S. cerevisiae* Nup159 and *H. sapiens* Nup214. Note rearranged domain organization in Nup214. All FG (Phe-Gly) sequence repeats are numbered, although some (e.g. near N-terminus) may not interact with nuclear transport receptors. Where FG repeats are too dense to be individually labeled, the corresponding region is labeled. Asterisks in Nup214 indicate structured portion of FG repeats observed in co-crystal with Crm1 (Port *et al.*, 2015, PMID 26489467). Beta-propeller structures in *Sc* Nup159 and *Hs* Nup214 have been experimentally verified (Weirich *et al.*, 2004, PMID 15574330; Napetschnig *et al.*, 2007, PMID 17264208) and are known to bind to RNA helicases *Sc* Dbp5 and *Hs* Ddx19 (respectively), which are involved in mRNA processing in terminal stages of mRNA export. Beta-propeller structure in Nup146 is predicted (Weirich *et al.* 2004). Alpha-helical regions were predicted using JPred4 (Drozdetskiy *et al.*, 2015, PMID 25883141). Thicker lines in alpha-helical regions indicate predicted coiled-coils or amphipathic helices. Alpha-helix at the C-terminus of *Sc* Nup159 is involved in forming a heterotrimeric complex with *Sc* Nup82 and *Sc* Nup116 (Yoshida *et al.*, 2011, PMID 21930948), whose counterparts in fission yeast are Nup82 and Nup189n, respectively. **(B)** Localization of Nup146[ΔFG5-12]-3mCherry to NPCs, with corresponding localization of Mto1[9A1-NE]-GFP. **(C)** Peptide counts and label-free quantification (LFQ) values for selected proteins from the two replicate experiments contributing to the graph in Fig. 6F. Complete datasets are in Supplementary

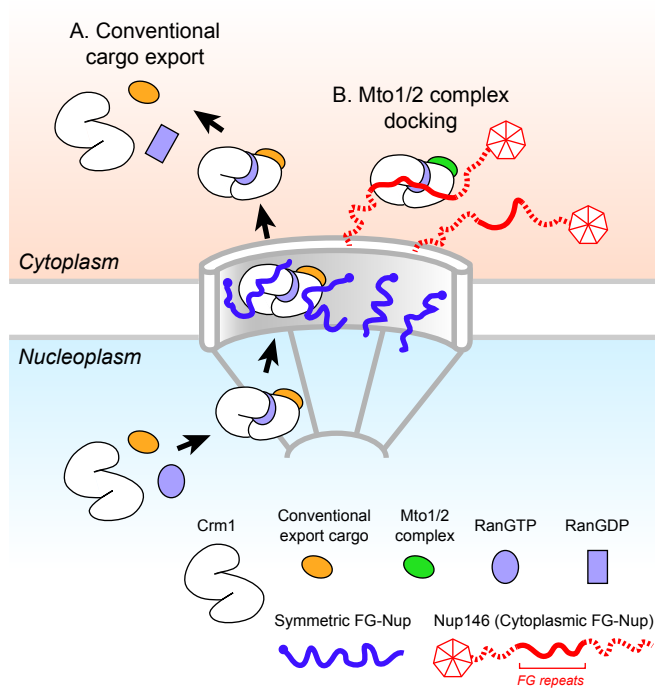

**Fig. 7 Model for Mto1/2 complex docking at the nuclear pore complex (NPC), compared to conventional nuclear export**

**(A)** Conventional export cargos form a trimeric complex with Crm1 and RanGTP in the nucleus. Passage through NPC permeability barrier depends on interaction of export complexes with FG repeats of symmetric FG-Nups. While passing through the NPC, some export complexes may also interact with FG repeats of Nup146 (not shown). Once in the cytoplasm, export complexes are disassembled by soluble RanBP1 and RanGAP, and RanGTP is hydrolyzed to RanGDP (here, multiple steps are simplified to a single step). **(B)** Mto1/2 complex docked at NPC. Mto1/2 is sourced from a cytoplasmic pool rather than a nucleoplasmic pool. The Mto1 NES-M binds Crm1 by mimicking an export cargo, and the docking complex binds to cytoplasmic FG-Nup Nup146. Docking requires RanGTP and FG repeats of Nup146. Style of drawing is adapted from Port *et al.* (2015, PMID 26489467). See also Figure 7 Supplement 1.

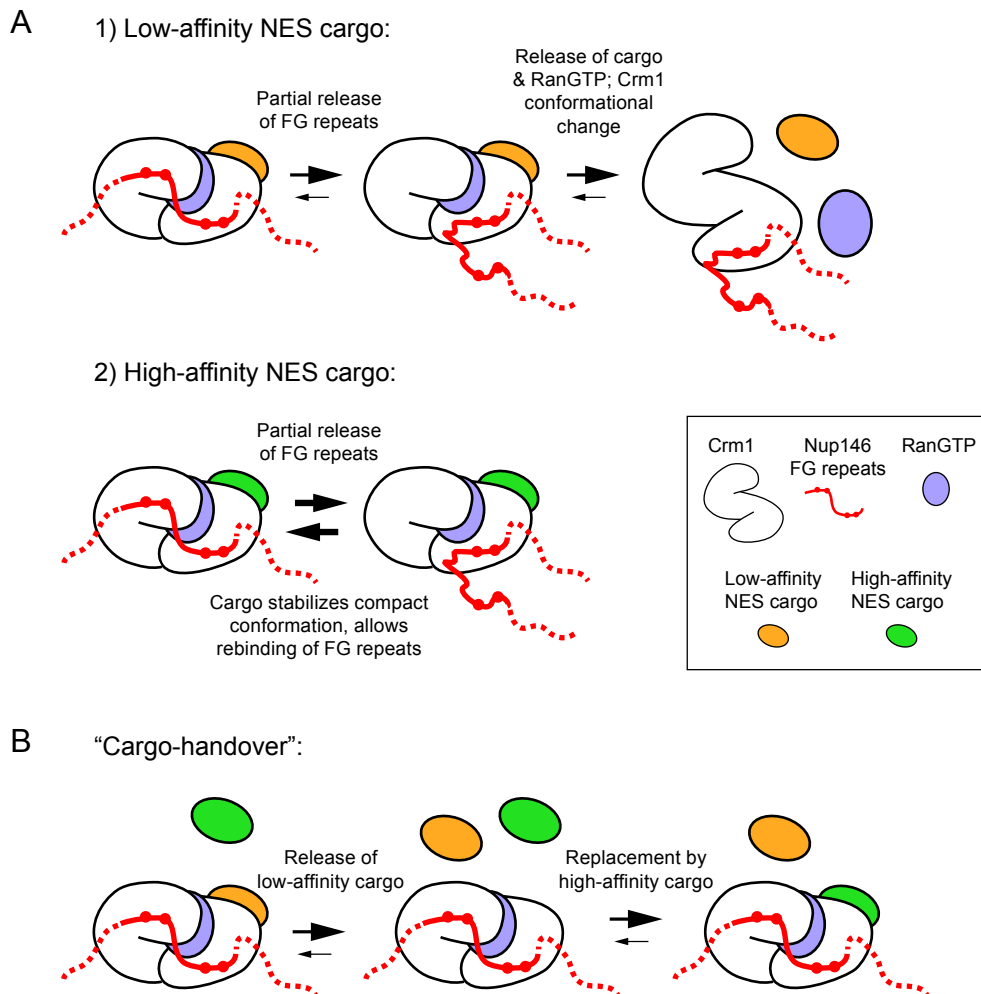

**Figure 7 Supplement 1. Models for stable docking of a high-affinity NES cargo at the cytoplasmic face of the nuclear pore complex via Nup146 and for formation of export-like complexes from cytoplasmic cargo.**

**(A)** Speculative model for how a high-affinity NES cargo could become docked at the cytoplasmic face of the nuclear pore complex (NPC). Style of drawing is adapted from Port *et al.* (2015, PMID 26489467). In diagrams, only the FG-repeat region of Nup146 is shown; by analogy to *Sc* Nup159, Nup146 is assumed to be anchored at the cytoplasmic face of the NPC by interaction of its C-terminal domain with partners Nup82 and Nsp1. Binding of Crm1 to cargo, RanGTP and Nup146 FG repeats all contribute cooperatively to Crm1 compact conformation. Therefore, 1) if cargo has only low affinity for Crm1, then after partial release of Nup146 FG repeats from Crm1, the trimeric export complex (Crm1, cargo and RanGTP) can disassemble, releasing cargo into the cytoplasm. However, 2) if cargo has a high affinity for Crm1, then stabilization of the Crm1 compact conformation by cargo binding allows partially released FG repeats to rebind to Crm1. Increased stability of interaction between trimeric complex and Nup146 FG repeats leads to increased residence time at the cytoplasmic face of the NPC. See main text for further details. **(B)** “Cargo-handover” as a potential mechanism for incorporating high-affinity NES cargos from the cytoplasm into export-like complexes at the cytoplasmic face of NPCs. First, a conventional nuclear export complex with a low-affinity NES cargo transiently interacts with Nup146 FG repeats during passage through the NPC. Recent integrated structural analysis in budding yeast suggests that FG repeats of *Sc* Nup159 may be directly adjacent to the symmetric FG-Nups at the centre of the NPC (Fernandez-Martinez *et al.*, 2016, PMID 27839866); therefore, even though Nup146 FG repeats are not required for export, some proportion of export complexes could be expected to interact with Nup146 during passage through the NPC. Second, low-affinity cargo dissociates from Crm1, while Crm1 remains bound to Nup146 and to RanGTP. Dissociation of low-affinity cargo could be either spontaneous or aided by RanBP1; in both cases this could occur without dissociation or hydrolysis of RanGTP (Koyama *et al.* 2010, PMID 27839866). In absence of cargo, compact Crm1 conformation (and RanGTP binding) may be partially stabilized by interaction with Nup146 FG repeats, as has been shown for FG repeats of *Hs* Nup214 (Hutten *et al.*, 2006, PMID 16943420). Finally, during a “window of opportunity” before dissociation of Crm1 from Nup146, a high-affinity NES cargo such as the Mto1 NES-M can bind to Crm1 to generate the export-like complex.
